# Supplementary material for: Sub-okra leaf shape conferred via chromosomal introgression from Gossypium barbadense L. improves photosynthetic productivity in short-season cotton (Gossypium hirsutum L.)
Source: Front Plant Sci. 2024 Jul 18;15:1393396. doi: 10.3389/fpls.2024.1393396 (PMC11291245; doi:10.3389/fpls.2024.1393396)
Supplement: Supplementary file 9 [file Table_1.xlsx]

## Sheet: Table S1
Table S1 Primers for detection of chromosome introgression segment
Name	Forward primer	Reverse primer	Product size with TM-1 (bp)	Product size with Hai 7124 (bp)	Genotype
					T(TM-1)	N(L28 NORMAL)	H(Hai7124)	S( L28 SUBOKRA)
InD_U13_3	GTGTCAATACATATCACATC	AAGATCTTCAGAGACAATAG	183	192	A	A	B	A
InD_U13_4	GTCCATGTGTGATACTGT	GAGAAGCCAAGATAAAGT	310	318	A	A	B	A
InD_U13_5	CTAAACATGTTCTGTGATG	CATGATAACGTAAGTGACTA	265	216	A	A	B	B
InD_U13_6	GTAATTCATCAGTGGTTATC	CAGTTTAAGTCCTTCAAGAT	179	162	A	A	B	B
InD_U13_7	GAAACTCTTCAACTTACTCT	CTATTCACACACCCTTAT	172	164	A	A	B	B
InD_U12_10	GATTGTAGAAGGGAATTAG	GGCTCTTAAGAAAGAAAAC	222	228	A	A	B	B
InD_U12_11	TATTAGATCAACTCCTCGAT	GAGTGGAGTGCAATTATTA	233	226	A	A	B	B
InD_U10_1	AGAGATCACTCATGTAACAC	GTATGCTCAGTTTATGAGA	186	179	A	A	B	B
InD_U7_1	CTCGAGATATTCAGTTAGAT	TAGTATCAAGTACGGTACAC	233	240	A	A	B	B
InD_U6_1	CTCTTTCTAAGTTCATGTTC	CACTTCAGAATAGCTTAAC	194	204	A	A	B	C
InD_U5_1	CATTTAGTACGGAGGAAT	GCAAACCAACTTAGTAGT	249	266	A	A	B	B
InD_U4_1	CATTCCAGTCTTAGATATAC	ACTTCATCTAGAAGGATAGA	205	214	A	A	B	B
InD_U3_1	GTCTAACTGTCGGTAAATA	GATCCAACAGAAGAAAAC	236	249	A	A	B	B
InD_U2_1	TGACACAATGTCTAGAGTTATC	CTCATCTATATTTCCCAACT	249	236	A	A	B	B
InD_U1_2	GTGACTCTGTATGCTTTT	CTCTGGTCCTCATTATTT	243	253	A	A	B	B
InD_D1_2	GAGAGTGAATGAGAAGAAT	CACACCTTACACAATAAAG	204	192	A	A	B	A
InD_D2_1	ACTTAAGTTCACTCCAACT	CACTTAGCTCTCTCAAAA	233	227	A	A	B	A
InD_D2_3	CCTGTCTCTCTCTCTCTAT	GCTACAAGAAACATCATC	225	294	A	A	B	B
InD_D2_4	CGATCATATCTGTTCTTTC	AAGCTAGTAAGGAATATGAG	194	201	A	A	B	A
InD_D2_5	CGATCATATCTGTTCTTTC	AAGCTAGTAAGGAATATGAG	194	202	A	A	B	A
Note: A and B mean the genotype of DNA marker in TM-1 and Hai7124, respectively. C means the specific genotype of DNA marker in L28 SUBOKRA.

## Sheet: Table S2
Table S2 Information of genes in the chromosomal introgression segment
G. barbadense L ID	Arabidopsis ID	G.hirstum L ID	Arabidopsis ID	ArabDesc	Swissprot_id	SwissProt_desc	Trembl_id	Trembl_desc	KEGG_id	KEGG_desc	Pfam_ids	InterProt_ids	GO_ids	NR_ids	NR_desc
GB_D01G2354	AT1G68450	GH_D01G2254	AT1G68450	VQ motif-containing protein	Q9CA36	VQ8_ARATH VQ motif-containing protein 8, chloroplastic OS=Arabidopsis thaliana GN=VQ8 PE=2 SV=1	A0A0D2QB25	A0A0D2QB25_GOSRA Uncharacterized protein OS=Gossypium raimondii GN=B456_002G233400 PE=4 SV=1	-	-	PF05678|VQ motif	IPR008889|VQ	-	gi|823138651|ref|XP_012469165.1|	PREDICTED: VQ motif-containing protein 8, chloroplastic-like [Gossypium raimondii] &gt;gi|763749070|gb|KJB16509.1| hypothetical protein B456_002G233400 [Gossypium raimondii]
GB_D01G2355	AT5G06530	GH_D01G2255	AT5G06530	ABC-2 type transporter family protein	Q93YS4	AB22G_ARATH ABC transporter G family member 22 OS=Arabidopsis thaliana GN=ABCG22 PE=1 SV=1	A0A0D2MF06	A0A0D2MF06_GOSRA Uncharacterized protein OS=Gossypium raimondii GN=B456_002G233500 PE=3 SV=1	cme:CYME_CMS467C	ATP-binding cassette, sub-family G, member 2; K05681 ATP-binding cassette, subfamily G (WHITE), member 2	PF01061|ABC-2 type transporter	IPR003439|ABC transporter-like;IPR003593|AAA+ ATPase domain;IPR013525|ABC-2 type transporter;IPR017871|ABC transporter, conserved site	cellular_component:GO:0016021|integral component of membrane;molecular_function:GO:0005524|ATP binding;GO:0016887|ATPase activity;	gi|823136655|ref|XP_012468094.1|	PREDICTED: ABC transporter G family member 22-like isoform X1 [Gossypium raimondii] &gt;gi|763749073|gb|KJB16512.1| hypothetical protein B456_002G233500 [Gossypium raimondii]
GB_D01G2356	AT3G11690	GH_D01G2256	AT3G11690	hypothetical protein	-	-	A0A0D2RBH1	A0A0D2RBH1_GOSRA Uncharacterized protein OS=Gossypium raimondii GN=B456_002G233600 PE=4 SV=1	-	-	-	-	-	gi|823136665|ref|XP_012468100.1|	PREDICTED: uncharacterized protein LOC105786274 [Gossypium raimondii] &gt;gi|763749076|gb|KJB16515.1| hypothetical protein B456_002G233600 [Gossypium raimondii]
GB_D01G2357	AT2G35880	GH_D01G2257	AT2G35880	TPX2 (targeting protein for Xklp2) protein family	Q8GYX9	WDL1_ARATH Protein WVD2-like 1 OS=Arabidopsis thaliana GN=WDL1 PE=1 SV=1	A0A0D2QHZ2	A0A0D2QHZ2_GOSRA Uncharacterized protein OS=Gossypium raimondii GN=B456_002G233700 PE=4 SV=1	-	-	PF06886|Targeting protein for Xklp2 (TPX2)	IPR027329|TPX2, C-terminal	-	gi|823136669|ref|XP_012468102.1|	PREDICTED: transcriptional regulator of filamentous growth FLO8 isoform X2 [Gossypium raimondii] &gt;gi|763749077|gb|KJB16516.1| hypothetical protein B456_002G233700 [Gossypium raimondii] &gt;gi|763749080|gb|KJB16519.1| hypothetical protein B456_002G233700 [Gossypium raimondii]
GB_D01G2358	AT2G35900	GH_D01G2258	AT2G35900	Mal d 1-associated protein	-	-	A0A0D2QHZ6	A0A0D2QHZ6_GOSRA Uncharacterized protein OS=Gossypium raimondii GN=B456_002G233800 PE=4 SV=1	-	-	-	-	cellular_component:GO:0005634|nucleus;	gi|823136672|ref|XP_012468103.1|	PREDICTED: uncharacterized protein LOC105786277 [Gossypium raimondii] &gt;gi|763749082|gb|KJB16521.1| hypothetical protein B456_002G233800 [Gossypium raimondii]
GB_D01G2359	-
GB_D01G2360	AT5G06410	GH_D01G2259	AT5G06410	DNAJ heat shock N-terminal domain-containing protein	Q8K3A0	HSC20_MOUSE Iron-sulfur cluster co-chaperone protein HscB, mitochondrial OS=Mus musculus GN=Hscb PE=1 SV=2	A0A0D2NS11	A0A0D2NS11_GOSRA Uncharacterized protein OS=Gossypium raimondii GN=B456_002G233900 PE=4 SV=1	cit:102609494	iron-sulfur cluster co-chaperone protein HscB, mitochondrial-like; K04082 molecular chaperone HscB	PF07743|HSCB C-terminal oligomerisation domain	IPR001623|DnaJ domain;IPR004640|Co-chaperone Hsc20;IPR009073|Co-chaperone HscB, C-terminal oligomerisation domain	biological_process:GO:0051259|protein oligomerization;GO:0006457|protein folding;molecular_function:GO:0051087|chaperone binding;	gi|823136674|ref|XP_012468104.1|	PREDICTED: iron-sulfur cluster co-chaperone protein HscB, mitochondrial [Gossypium raimondii] &gt;gi|763749083|gb|KJB16522.1| hypothetical protein B456_002G233900 [Gossypium raimondii] &gt;gi|763749084|gb|KJB16523.1| hypothetical protein B456_002G233900 [Gossypium raimondii] &gt;gi|763749085|gb|KJB16524.1| hypothetical protein B456_002G233900 [Gossypium raimondii]
GB_D01G2361	AT4G28360	GH_D01G2260	AT4G28360	Ribosomal protein L22p/L17e family protein	P49558	RK22_ODOSI 50S ribosomal protein L22, chloroplastic OS=Odontella sinensis GN=rpl22 PE=3 SV=1	A0A0D2QX18	A0A0D2QX18_GOSRA Uncharacterized protein OS=Gossypium raimondii GN=B456_002G2340002 PE=3 SV=1	tcc:TCM_023088	Ribosomal protein L22p	PF00237|Ribosomal protein L22p/L17e	IPR001063|Ribosomal protein L22/L17;IPR005727|Ribosomal protein L22, bacterial/chloroplast-type	biological_process:GO:0006412|translation;cellular_component:GO:0015934|large ribosomal subunit;molecular_function:GO:0003735|structural constituent of ribosome;	gi|763744381|gb|KJB11820.1|	hypothetical protein B456_002G2340002 [Gossypium raimondii]
GB_D01G2362	-
GB_D01G2363	-
GB_D01G2364	AT3G11760	GH_D01G2261	AT3G11760	structural maintenance of chromosomes flexible hinge domain protein	-	-	A0A0D2RBI1	A0A0D2RBI1_GOSRA Uncharacterized protein OS=Gossypium raimondii GN=B456_002G234100 PE=4 SV=1	-	-	PF10358|N-terminal C2 in EEIG1 and EHBP1 proteins	IPR019448|EEIG1/EHBP1 N-terminal domain	-	gi|823136676|ref|XP_012468106.1|	PREDICTED: uncharacterized protein LOC105786279 [Gossypium raimondii] &gt;gi|763749086|gb|KJB16525.1| hypothetical protein B456_002G234100 [Gossypium raimondii] &gt;gi|763749087|gb|KJB16526.1| hypothetical protein B456_002G234100 [Gossypium raimondii]
GB_D01G2365	AT3G44150	GH_D01G2262	AT3G44150	Expp1 protein	-	-	A0A0D2MF21	A0A0D2MF21_GOSRA Uncharacterized protein OS=Gossypium raimondii GN=B456_002G234200 PE=4 SV=1	eus:EUTSA_v10023083mg	hypothetical protein; K15455 diphthamide biosynthesis protein 3	-	-	-	gi|823136678|ref|XP_012468107.1|	PREDICTED: uncharacterized protein LOC105786280 [Gossypium raimondii] &gt;gi|763749088|gb|KJB16527.1| hypothetical protein B456_002G234200 [Gossypium raimondii]
		GH_D01G2263	-	-	-	-	A0A0D2NS15	A0A0D2NS15_GOSRA Uncharacterized protein OS=Gossypium raimondii GN=B456_002G234300 PE=4 SV=1	-	-	PF02362|B3 DNA binding domain	IPR003340|B3 DNA binding domain	-	gi|763749089|gb|KJB16528.1|	hypothetical protein B456_002G234300 [Gossypium raimondii]
GB_D01G2366	-
GB_D01G2367	AT5G06510	GH_D01G2264	AT5G06510	nuclear factor Y%2C subunit A10	Q8LFU0	NFYAA_ARATH Nuclear transcription factor Y subunit A-10 OS=Arabidopsis thaliana GN=NFYA10 PE=2 SV=2	A0A0D2QB35	A0A0D2QB35_GOSRA Uncharacterized protein OS=Gossypium raimondii GN=B456_002G234400 PE=4 SV=1	pmum:103339547	nuclear transcription factor Y subunit A-10; K08064 nuclear transcription factor Y, alpha	PF02045|CCAAT-binding transcription factor (CBF-B/NF-YA) subunit B	IPR001289|Nuclear transcription factor Y subunit A	biological_process:GO:0006355|regulation of transcription, DNA-templated;molecular_function:GO:0003700|transcription factor activity, sequence-specific DNA binding;	gi|823136701|ref|XP_012468119.1|	PREDICTED: nuclear transcription factor Y subunit A-10-like [Gossypium raimondii] &gt;gi|763749090|gb|KJB16529.1| hypothetical protein B456_002G234400 [Gossypium raimondii]
GB_D01G2368	AT1G74360	GH_D01G2265	AT1G74360	Leucine-rich repeat protein kinase family protein	C0LGJ1	Y1743_ARATH Probable LRR receptor-like serine	A0A0D2RBI3	A0A0D2RBI3_GOSRA Uncharacterized protein OS=Gossypium raimondii GN=B456_002G234500 PE=4 SV=1	bvg:104883663	LRR receptor-like serine	PF13855|Leucine rich repeat	IPR001611|Leucine-rich repeat;IPR003591|Leucine-rich repeat, typical subtype;IPR013210|Leucine-rich repeat-containing N-terminal, plant-type	biological_process:GO:0006468|protein phosphorylation;cellular_component:GO:0016021|integral component of membrane;molecular_function:GO:0004674|protein serine/threonine kinase activity;GO:0005524|ATP binding;	gi|823136691|ref|XP_012468113.1|	PREDICTED: probable LRR receptor-like serine
GB_D01G2369	AT5G23960	GH_D01G2266	AT5G23960	terpene synthase 21	Q43714	DCS3_GOSAR (+)-delta-cadinene synthase isozyme A OS=Gossypium arboreum GN=CAD1-A PE=2 SV=1	A0A0D2QB38	A0A0D2QB38_GOSRA Uncharacterized protein OS=Gossypium raimondii GN=B456_002G234600 PE=4 SV=1	vvi:100232954	(-)-germacrene D synthase (EC:4.2.3.22 4.2.3.75); K15803 (-)-germacrene D synthase [EC:4.2.3.22 4.2.3.75]	PF01397|Terpene synthase, N-terminal domain	IPR001906|Terpene synthase, N-terminal domain;IPR005630|Terpene synthase, metal-binding domain	biological_process:GO:0008152|metabolic process;molecular_function:GO:0000287|magnesium ion binding;GO:0010333|terpene synthase activity;	gi|823136697|ref|XP_012468116.1|	PREDICTED: (+)-delta-cadinene synthase isozyme A-like [Gossypium raimondii] &gt;gi|763749095|gb|KJB16534.1| hypothetical protein B456_002G234600 [Gossypium raimondii]
GB_D01G2370	AT3G52440	GH_D01G2267	AT3G52440	Dof-type zinc finger DNA-binding family protein	Q9SVC5	DOF35_ARATH Dof zinc finger protein DOF3.5 OS=Arabidopsis thaliana GN=DOF3.5 PE=3 SV=1	A0A0D2MF28	A0A0D2MF28_GOSRA Uncharacterized protein OS=Gossypium raimondii GN=B456_002G234700 PE=4 SV=1	brp:103855006	cyclic dof factor 1-like; K16222 Dof zinc finger protein DOF5.5	PF02701|Dof domain, zinc finger	IPR003851|Zinc finger, Dof-type	biological_process:GO:0006355|regulation of transcription, DNA-templated;molecular_function:GO:0003677|DNA binding;	gi|823136705|ref|XP_012468121.1|	PREDICTED: dof zinc finger protein DOF3.5-like [Gossypium raimondii] &gt;gi|763749098|gb|KJB16537.1| hypothetical protein B456_002G234700 [Gossypium raimondii]
GB_D01G2371	AT2G35930	GH_D01G2268	AT2G35930	plant U-box 23	Q84TG3	PUB23_ARATH E3 ubiquitin-protein ligase PUB23 OS=Arabidopsis thaliana GN=PUB23 PE=1 SV=1	A0A0D2NS20	A0A0D2NS20_GOSRA Uncharacterized protein OS=Gossypium raimondii GN=B456_002G234800 PE=4 SV=1	egr:104440434	uncharacterized LOC104440434; K01876 aspartyl-tRNA synthetase [EC:6.1.1.12]	PF04564|U-box domain	IPR003613|U box domain	biological_process:GO:0016567|protein ubiquitination;molecular_function:GO:0004842|ubiquitin-protein transferase activity;	gi|823136699|ref|XP_012468117.1|	PREDICTED: E3 ubiquitin-protein ligase PUB23-like [Gossypium raimondii] &gt;gi|763749099|gb|KJB16538.1| hypothetical protein B456_002G234800 [Gossypium raimondii]
GB_D01G2372	AT2G35940	GH_D01G2269	AT2G35940	BEL1-like homeodomain 1	Q9SJ56	BLH1_ARATH BEL1-like homeodomain protein 1 OS=Arabidopsis thaliana GN=BLH1 PE=1 SV=1	A0A0D2RBJ1	A0A0D2RBJ1_GOSRA Uncharacterized protein OS=Gossypium raimondii GN=B456_002G234900 PE=4 SV=1	bdi:100844103	homeobox protein BEL1 homolog; K16670 homeobox protein Meis2	PF07526|Associated with HOX	IPR001356|Homeobox domain;IPR006563|POX domain;IPR008422|Homeobox KN domain	biological_process:GO:0010197|polar nucleus fusion;GO:0010201|response to continuous far red light stimulus by the high-irradiance response system;GO:0006355|regulation of transcription, DNA-templated;cellular_component:GO:0005737|cytoplasm;GO:0005634|nucleus;molecular_function:GO:0042803|protein homodimerization activity;GO:0046982|protein heterodimerization activity;GO:0003677|DNA binding;	gi|823136693|ref|XP_012468114.1|	PREDICTED: BEL1-like homeodomain protein 1 [Gossypium raimondii] &gt;gi|763749100|gb|KJB16539.1| hypothetical protein B456_002G234900 [Gossypium raimondii] &gt;gi|763749101|gb|KJB16540.1| hypothetical protein B456_002G234900 [Gossypium raimondii]
GB_D01G2373	AT3G11670	GH_D01G2270	AT3G11670	UDP-Glycosyltransferase superfamily protein	Q6DW74	DGDG1_LOTJA Digalactosyldiacylglycerol synthase 1, chloroplastic OS=Lotus japonicus GN=DGD1 PE=2 SV=1	A0A0D2NS22	A0A0D2NS22_GOSRA Uncharacterized protein OS=Gossypium raimondii GN=B456_002G235100 PE=4 SV=1	tcc:TCM_022931	UDP-Glycosyltransferase superfamily protein isoform 1; K09480 digalactosyldiacylglycerol synthase [EC:2.4.1.241]	PF00534|Glycosyl transferases group 1	IPR001296|Glycosyl transferase, family 1	molecular_function:GO:0016740|transferase activity;	gi|823136689|ref|XP_012468112.1|	PREDICTED: digalactosyldiacylglycerol synthase 1, chloroplastic-like [Gossypium raimondii] &gt;gi|763749104|gb|KJB16543.1| hypothetical protein B456_002G235100 [Gossypium raimondii]
GB_D01G2374	AT5G06360	GH_D01G2271	AT5G06360	Ribosomal protein S8e family protein	Q54GN8	NSA2_DICDI Ribosome biogenesis protein NSA2 homolog OS=Dictyostelium discoideum GN=nsa2 PE=3 SV=1	A0A0B0MEL2	A0A0B0MEL2_GOSAR Ribosome biogenesis NSA2 OS=Gossypium arboreum GN=F383_13287 PE=4 SV=1	tcc:TCM_022929	Ribosomal protein S8e family protein; K14842 ribosome biogenesis protein NSA2	PF01201|Ribosomal protein S8e	IPR022309|Ribosomal protein S8e/ribosomal biogenesis NSA2	cellular_component:GO:0005840|ribosome;	gi|728807866|gb|KHF97858.1|	Ribosome biogenesis NSA2 [Gossypium arboreum]
GB_D01G2375	AT2G01820	GH_D01G2272	AT2G01820	Leucine-rich repeat protein kinase family protein	Q9SIT1	TMK3_ARATH Receptor-like kinase TMK3 OS=Arabidopsis thaliana GN=TMK3 PE=2 SV=1	A0A0D2QB46	A0A0D2QB46_GOSRA Uncharacterized protein OS=Gossypium raimondii GN=B456_002G235300 PE=4 SV=1	vvi:100265723	probable receptor protein kinase TMK1; K00924	PF07714|Protein tyrosine kinase	IPR000719|Protein kinase domain;IPR001245|Serine-threonine/tyrosine-protein kinase catalytic domain;IPR003591|Leucine-rich repeat, typical subtype;IPR008271|Serine/threonine-protein kinase, active site;IPR013210|Leucine-rich repeat-containing N-terminal, plant-type;IPR017441|Protein kinase, ATP binding site	biological_process:GO:0006468|protein phosphorylation;cellular_component:GO:0016021|integral component of membrane;molecular_function:GO:0005524|ATP binding;GO:0004674|protein serine/threonine kinase activity;	gi|823136683|ref|XP_012468108.1|	PREDICTED: probable receptor protein kinase TMK1 [Gossypium raimondii] &gt;gi|823136685|ref|XP_012468109.1| PREDICTED: probable receptor protein kinase TMK1 [Gossypium raimondii] &gt;gi|823136687|ref|XP_012468111.1| PREDICTED: probable receptor protein kinase TMK1 [Gossypium raimondii] &gt;gi|763749109|gb|KJB16548.1| hypothetical protein B456_002G235300 [Gossypium raimondii] &gt;gi|763749110|gb|K…
GB_D01G2376	AT3G09180	GH_D01G2273	AT3G09180	mediator of RNA polymerase II transcription subunit	Q8RWM3	MED27_ARATH Mediator of RNA polymerase II transcription subunit 27 OS=Arabidopsis thaliana GN=MED27 PE=1 SV=1	A0A0D2QI27	A0A0D2QI27_GOSRA Uncharacterized protein OS=Gossypium raimondii GN=B456_002G235400 PE=4 SV=1	tcc:TCM_022927	Serine	PF11571|Mediator complex subunit 27	IPR021627|Mediator complex, subunit Med27	-	gi|823136710|ref|XP_012468122.1|	PREDICTED: mediator of RNA polymerase II transcription subunit 27 isoform X1 [Gossypium raimondii] &gt;gi|763749117|gb|KJB16556.1| hypothetical protein B456_002G235400 [Gossypium raimondii]
GB_D01G2377	AT5G06340	GH_D01G2274	AT5G06340	nudix hydrolase homolog 27	Q9FNH4	NUD27_ARATH Nudix hydrolase 27, chloroplastic OS=Arabidopsis thaliana GN=NUDT27 PE=1 SV=1	A0A0D2QB51	A0A0D2QB51_GOSRA Uncharacterized protein OS=Gossypium raimondii GN=B456_002G235500 PE=3 SV=1	ota:Ot10g03540	hydrolase, NUDIX family, NudH subfamily (ISS); K08311 putative (di)nucleoside polyphosphate hydrolase [EC:3.6.1.-]	PF00293|NUDIX domain	IPR000086|NUDIX hydrolase domain;IPR020084|NUDIX hydrolase, conserved site;IPR020476|NUDIX hydrolase	cellular_component:GO:0009507|chloroplast;molecular_function:GO:0034432|bis(5'-adenosyl)-pentaphosphatase activity;	gi|823136718|ref|XP_012468127.1|	PREDICTED: nudix hydrolase 27, chloroplastic-like [Gossypium raimondii] &gt;gi|763749120|gb|KJB16559.1| hypothetical protein B456_002G235500 [Gossypium raimondii]
GB_D01G2378	AT2G35950	GH_D01G2275	AT2G35950	embryo sac development arrest 12	-	-	A0A0D2QHY0	A0A0D2QHY0_GOSRA Uncharacterized protein OS=Gossypium raimondii GN=B456_002G235600 PE=4 SV=1	-	-	-	-	biological_process:GO:0009561|megagametogenesis;	gi|823136720|ref|XP_012468128.1|	PREDICTED: uncharacterized protein LOC105786296 [Gossypium raimondii] &gt;gi|763749067|gb|KJB16506.1| hypothetical protein B456_002G235600 [Gossypium raimondii]
GB_D01G2379	AT3G52460	GH_D01G2276	AT3G52460	hydroxyproline-rich glycoprotein family protein	-	-	A0A0D2QI05	A0A0D2QI05_GOSRA Uncharacterized protein OS=Gossypium raimondii GN=B456_002G235700 PE=4 SV=1	-	-	-	-	cellular_component:GO:0016021|integral component of membrane;	gi|763749092|gb|KJB16531.1|	hypothetical protein B456_002G235700 [Gossypium raimondii]
GB_D01G2380	AT3G11660	GH_D01G2277	AT3G11660	NDR1/HIN1-like 1	Q9SJ52	YLS9_ARATH Protein YLS9 OS=Arabidopsis thaliana GN=YLS9 PE=2 SV=1	A0A0D2MF34	A0A0D2MF34_GOSRA Uncharacterized protein OS=Gossypium raimondii GN=B456_002G235800 PE=4 SV=1	-	-	PF03168|Late embryogenesis abundant protein	IPR004864|Late embryogenesis abundant protein, LEA-14	cellular_component:GO:0016021|integral component of membrane;	gi|823136722|ref|XP_012468129.1|	PREDICTED: protein YLS9-like [Gossypium raimondii] &gt;gi|763749108|gb|KJB16547.1| hypothetical protein B456_002G235800 [Gossypium raimondii]
		GH_D01G2278	-	-	-	-	-	-	-	-	-	-	-	-	-
GB_D01G2381	-
GB_D01G2382	AT2G35980	GH_D01G2279	AT2G35980	Late embryogenesis abundant (LEA) hydroxyproline-rich glycoprotein family	Q9SJ52	YLS9_ARATH Protein YLS9 OS=Arabidopsis thaliana GN=YLS9 PE=2 SV=1	A0A0D2MF43	A0A0D2MF43_GOSRA Uncharacterized protein OS=Gossypium raimondii GN=B456_002G235900 PE=4 SV=1	ath:AT1G32270	ATSYP24; syntaxin-24; K08488 syntaxin 7	PF03168|Late embryogenesis abundant protein	IPR004864|Late embryogenesis abundant protein, LEA-14	cellular_component:GO:0016021|integral component of membrane;	gi|823136724|ref|XP_012468130.1|	PREDICTED: protein YLS9-like [Gossypium raimondii] &gt;gi|763749123|gb|KJB16562.1| hypothetical protein B456_002G235900 [Gossypium raimondii]
GB_D01G2383	AT3G52500	GH_D01G2280	AT3G52500	Eukaryotic aspartyl protease family protein	Q766C2	NEP2_NEPGR Aspartic proteinase nepenthesin-2 OS=Nepenthes gracilis GN=nep2 PE=1 SV=1	A0A0D2NS34	A0A0D2NS34_GOSRA Uncharacterized protein OS=Gossypium raimondii GN=B456_002G236000 PE=4 SV=1	tcc:TCM_041550	Eukaryotic aspartyl protease family protein isoform 1; K00924	PF14541|Xylanase inhibitor C-terminal	IPR001461|Aspartic peptidase A1 family;IPR032799|Xylanase inhibitor, C-terminal;IPR032861|Xylanase inhibitor, N-terminal;IPR033121|Peptidase family A1 domain	biological_process:GO:0030163|protein catabolic process;GO:0006508|proteolysis;molecular_function:GO:0004190|aspartic-type endopeptidase activity;	gi|823136728|ref|XP_012468131.1|	PREDICTED: aspartic proteinase nepenthesin-2-like [Gossypium raimondii] &gt;gi|763749124|gb|KJB16563.1| hypothetical protein B456_002G236000 [Gossypium raimondii]
GB_D01G2384	AT5G06300	GH_D01G2281	AT5G06300	Putative lysine decarboxylase family protein	Q8GW29	LOG7_ARATH Cytokinin riboside 5'-monophosphate phosphoribohydrolase LOG7 OS=Arabidopsis thaliana GN=LOG7 PE=1 SV=2	A0A0D2QI10	A0A0D2QI10_GOSRA Uncharacterized protein OS=Gossypium raimondii GN=B456_002G236100 PE=4 SV=1	mdm:103454147	cytokinin riboside 5'-monophosphate phosphoribohydrolase LOG7; K06966 uncharacterized protein	PF03641|Possible lysine decarboxylase	IPR031100|LOG family	biological_process:GO:0009691|cytokinin biosynthetic process;molecular_function:GO:0016799|hydrolase activity, hydrolyzing N-glycosyl compounds;	gi|823136730|ref|XP_012468132.1|	PREDICTED: cytokinin riboside 5&apos;-monophosphate phosphoribohydrolase LOG7-like [Gossypium raimondii] &gt;gi|763749097|gb|KJB16536.1| hypothetical protein B456_002G236100 [Gossypium raimondii]
GB_D01G2385	AT5G06280	GH_D01G2282	AT5G06280	hypothetical protein	-	-	A0A0D2RBJ9	A0A0D2RBJ9_GOSRA Uncharacterized protein OS=Gossypium raimondii GN=B456_002G236200 PE=4 SV=1	-	-	-	-	-	gi|823136734|ref|XP_012468134.1|	PREDICTED: uncharacterized protein LOC105786304 [Gossypium raimondii] &gt;gi|763749111|gb|KJB16550.1| hypothetical protein B456_002G236200 [Gossypium raimondii]
GB_D01G2386	AT2G36020	GH_D01G2283	AT2G36020	HVA22-like protein J	Q8GXE9	HA22J_ARATH HVA22-like protein j OS=Arabidopsis thaliana GN=HVA22J PE=2 SV=2	A0A0D2QI21	A0A0D2QI21_GOSRA HVA22-like protein OS=Gossypium raimondii GN=B456_002G236300 PE=3 SV=1	brp:103857603	HVA22-like protein j; K17338 receptor expression-enhancing protein 1	PF03134|TB2/DP1, HVA22 family	IPR004345|TB2/DP1/HVA22-related protein	cellular_component:GO:0016020|membrane;	gi|823136732|ref|XP_012468133.1|	PREDICTED: HVA22-like protein j [Gossypium raimondii] &gt;gi|763749112|gb|KJB16551.1| hypothetical protein B456_002G236300 [Gossypium raimondii]
GB_D01G2387	AT2G36026	GH_D01G2284	AT2G36026	Ovate family protein	Q3EAL1	OFP6_ARATH Transcription repressor OFP6 OS=Arabidopsis thaliana GN=OFP6 PE=1 SV=1	A0A0D2NHL4	A0A0D2NHL4_GOSRA Uncharacterized protein OS=Gossypium raimondii GN=B456_002G236400 PE=4 SV=1	smo:SELMODRAFT_437676	hypothetical protein; K01870 isoleucyl-tRNA synthetase [EC:6.1.1.5]	PF04844|Transcriptional repressor, ovate	IPR006458|Ovate protein family, C-terminal	-	gi|823136740|ref|XP_012468138.1|	PREDICTED: transcription repressor OFP6-like [Gossypium raimondii] &gt;gi|763745259|gb|KJB12698.1| hypothetical protein B456_002G236400 [Gossypium raimondii]
GB_D01G2388	AT5G04820	GH_D01G2285	AT5G04820	ovate family protein 13	Q9FMC8	OPF13_ARATH Transcription repressor OFP13 OS=Arabidopsis thaliana GN=OFP13 PE=2 SV=1	A0A0D2QB54	A0A0D2QB54_GOSRA Uncharacterized protein OS=Gossypium raimondii GN=B456_002G236500 PE=4 SV=1	-	-	PF04844|Transcriptional repressor, ovate	IPR006458|Ovate protein family, C-terminal	-	gi|823136742|ref|XP_012468139.1|	PREDICTED: transcription repressor OFP15-like [Gossypium raimondii]
GB_D01G2389	AT3G52560	GH_D01G2286	AT3G52560	ubiquitin E2 variant 1D-4	Q9SVD7	UEV1D_ARATH Ubiquitin-conjugating enzyme E2 variant 1D OS=Arabidopsis thaliana GN=UEV1D PE=1 SV=1	A0A0D2QI37	A0A0D2QI37_GOSRA Uncharacterized protein OS=Gossypium raimondii GN=B456_002G236600 PE=4 SV=1	gmx:100816570	ubiquitin-conjugating enzyme E2 variant 1D-like; K10704 ubiquitin-conjugating enzyme E2 variant	PF00179|Ubiquitin-conjugating enzyme	IPR000608|Ubiquitin-conjugating enzyme E2	molecular_function:GO:0016874|ligase activity;	gi|571440932|ref|XP_006575294.1|	PREDICTED: ubiquitin-conjugating enzyme E2 variant 1D-like [Glycine max]
GB_D01G2390	AT3G11600	GH_D01G2287	AT3G11600	E3 ubiquitin-protein ligase	-	-	A0A0D2NS35	A0A0D2NS35_GOSRA Uncharacterized protein OS=Gossypium raimondii GN=B456_002G236700 PE=4 SV=1	-	-	-	-	-	gi|823136746|ref|XP_012468141.1|	PREDICTED: uncharacterized protein LOC105786310 [Gossypium raimondii] &gt;gi|763749129|gb|KJB16568.1| hypothetical protein B456_002G236700 [Gossypium raimondii]
GB_D01G2391	AT1G52340	GH_D01G2288	AT1G52340	NAD(P)-binding Rossmann-fold superfamily protein	Q94KL7	SILD_FORIN Secoisolariciresinol dehydrogenase (Fragment) OS=Forsythia intermedia PE=1 SV=1	A0A0D2QB57	A0A0D2QB57_GOSRA Uncharacterized protein OS=Gossypium raimondii GN=B456_002G236800 PE=3 SV=1	vvi:100265470	xanthoxin dehydrogenase; K09841 xanthoxin dehydrogenase [EC:1.1.1.288]	PF13561|Enoyl-(Acyl carrier protein) reductase	IPR002347|Short-chain dehydrogenase/reductase SDR	-	gi|823136748|ref|XP_012468142.1|	PREDICTED: momilactone A synthase-like [Gossypium raimondii] &gt;gi|763749130|gb|KJB16569.1| hypothetical protein B456_002G236800 [Gossypium raimondii]
GB_D01G2392	AT1G52340
GB_D01G2393	AT1G52340
GB_D01G2394	-
GB_D01G2395	AT1G40390
		GH_D01G2289	AT3G26770	NAD(P)-binding Rossmann-fold superfamily protein	Q94KL7	SILD_FORIN Secoisolariciresinol dehydrogenase (Fragment) OS=Forsythia intermedia PE=1 SV=1	A0A0D2QI42	A0A0D2QI42_GOSRA Uncharacterized protein OS=Gossypium raimondii GN=B456_002G237000 PE=3 SV=1	osa:4335093	Os04g0179200; K13070 momilactone-A synthase [EC:1.1.1.295]	PF13561|Enoyl-(Acyl carrier protein) reductase	IPR002347|Short-chain dehydrogenase/reductase SDR	-	gi|823250111|ref|XP_012457655.1|	PREDICTED: secoisolariciresinol dehydrogenase-like [Gossypium raimondii]
GB_D01G2396	AT1G52340	GH_D01G2290	AT1G52340	NAD(P)-binding Rossmann-fold superfamily protein	Q94KL7	SILD_FORIN Secoisolariciresinol dehydrogenase (Fragment) OS=Forsythia intermedia PE=1 SV=1	A0A0D2QI42	A0A0D2QI42_GOSRA Uncharacterized protein OS=Gossypium raimondii GN=B456_002G237000 PE=3 SV=1	pop:POPTR_0001s06170g	POPTRDRAFT_547844; GLUCOSE INSENSITIVE 1 family protein; K09841 xanthoxin dehydrogenase [EC:1.1.1.288]	PF13561|Enoyl-(Acyl carrier protein) reductase	IPR002347|Short-chain dehydrogenase/reductase SDR	-	gi|823136751|ref|XP_012468143.1|	PREDICTED: secoisolariciresinol dehydrogenase-like [Gossypium raimondii] &gt;gi|763749132|gb|KJB16571.1| hypothetical protein B456_002G237000 [Gossypium raimondii]
		GH_D01G2291	-	-	-	-	A0A0D2R303	A0A0D2R303_GOSRA Uncharacterized protein OS=Gossypium raimondii GN=B456_002G091600 PE=4 SV=1	-	-	-	-	-	gi|763746296|gb|KJB13735.1|	hypothetical protein B456_002G091600 [Gossypium raimondii]
GB_D01G2397	AT1G52340	GH_D01G2292	AT1G52340	NAD(P)-binding Rossmann-fold superfamily protein	Q94KL7	SILD_FORIN Secoisolariciresinol dehydrogenase (Fragment) OS=Forsythia intermedia PE=1 SV=1	A0A0D2NS36	A0A0D2NS36_GOSRA Uncharacterized protein OS=Gossypium raimondii GN=B456_002G237200 PE=3 SV=1	egu:105045553	zerumbone synthase-like; K09841 xanthoxin dehydrogenase [EC:1.1.1.288]	PF13561|Enoyl-(Acyl carrier protein) reductase	IPR002347|Short-chain dehydrogenase/reductase SDR	-	gi|823136753|ref|XP_012468144.1|	PREDICTED: momilactone A synthase-like [Gossypium raimondii] &gt;gi|763749134|gb|KJB16573.1| hypothetical protein B456_002G237200 [Gossypium raimondii]
		GH_D01G2293	AT1G52340	NAD(P)-binding Rossmann-fold superfamily protein	Q94KL8	SILD_PODPE Secoisolariciresinol dehydrogenase (Fragment) OS=Podophyllum peltatum PE=1 SV=1	A0A0D2QB59	A0A0D2QB59_GOSRA Uncharacterized protein OS=Gossypium raimondii GN=B456_002G237300 PE=3 SV=1	brp:103871215	xanthoxin dehydrogenase; K09841 xanthoxin dehydrogenase [EC:1.1.1.288]	PF13561|Enoyl-(Acyl carrier protein) reductase	IPR002347|Short-chain dehydrogenase/reductase SDR	-	gi|823136755|ref|XP_012468145.1|	PREDICTED: momilactone A synthase-like [Gossypium raimondii] &gt;gi|763749135|gb|KJB16574.1| hypothetical protein B456_002G237300 [Gossypium raimondii]
		GH_D01G2294	AT1G52340	NAD(P)-binding Rossmann-fold superfamily protein	Q94KL8	SILD_PODPE Secoisolariciresinol dehydrogenase (Fragment) OS=Podophyllum peltatum PE=1 SV=1	A0A0D2QI49	A0A0D2QI49_GOSRA Uncharacterized protein OS=Gossypium raimondii GN=B456_002G237500 PE=3 SV=1	sly:100750250	uncharacterized LOC100750250; K09841 xanthoxin dehydrogenase [EC:1.1.1.288]	PF13561|Enoyl-(Acyl carrier protein) reductase	IPR002347|Short-chain dehydrogenase/reductase SDR	biological_process:GO:0055114|oxidation-reduction process;cellular_component:GO:0016021|integral component of membrane;molecular_function:GO:0016491|oxidoreductase activity;	gi|823136759|ref|XP_012468147.1|	PREDICTED: secoisolariciresinol dehydrogenase-like [Gossypium raimondii] &gt;gi|763749137|gb|KJB16576.1| hypothetical protein B456_002G237500 [Gossypium raimondii]
GB_D01G2398	AT3G51680
GB_D01G2399	AT2G47140	GH_D01G2295	AT2G47140	NAD(P)-binding Rossmann-fold superfamily protein	Q94KL7	SILD_FORIN Secoisolariciresinol dehydrogenase (Fragment) OS=Forsythia intermedia PE=1 SV=1	A0A0D2MF54	A0A0D2MF54_GOSRA Uncharacterized protein OS=Gossypium raimondii GN=B456_002G237600 PE=3 SV=1	bdi:100827045	zerumbone synthase; K09841 xanthoxin dehydrogenase [EC:1.1.1.288]	PF13561|Enoyl-(Acyl carrier protein) reductase	IPR002347|Short-chain dehydrogenase/reductase SDR;IPR020904|Short-chain dehydrogenase/reductase, conserved site	biological_process:GO:0055114|oxidation-reduction process;molecular_function:GO:0016491|oxidoreductase activity;	gi|823136761|ref|XP_012468149.1|	PREDICTED: secoisolariciresinol dehydrogenase-like [Gossypium raimondii] &gt;gi|763749138|gb|KJB16577.1| hypothetical protein B456_002G237600 [Gossypium raimondii]
GB_D01G2400	AT2G01050	GH_D01G2296	AT2G01050	zinc ion binding / nucleic acid binding protein	-	-	A0A0D2NK13	A0A0D2NK13_GOSRA Uncharacterized protein OS=Gossypium raimondii GN=B456_002G087100 PE=4 SV=1	pda:103721627	coatomer subunit beta'-1-like; K17302 coatomer, subunit beta'	PF14111|Domain of unknown function (DUF4283)	IPR025558|Domain of unknown function DUF4283	-	gi|763746214|gb|KJB13653.1|	hypothetical protein B456_002G087100 [Gossypium raimondii]
GB_D01G2401	AT5G37570	GH_D01G2297	AT5G37570	Pentatricopeptide repeat (PPR-like) superfamily protein	Q9LS72	PP261_ARATH Pentatricopeptide repeat-containing protein At3g29230 OS=Arabidopsis thaliana GN=PCMP-E27 PE=2 SV=1	A0A0D2QB62	A0A0D2QB62_GOSRA Uncharacterized protein OS=Gossypium raimondii GN=B456_002G237700 PE=4 SV=1	mtr:MTR_4g024860	Pentatricopeptide repeat-containing protein; K19589 release factor glutamine methyltransferase [EC:2.1.1.297]	PF01535|PPR repeat	IPR002885|Pentatricopeptide repeat	-	gi|823136763|ref|XP_012468150.1|	PREDICTED: putative pentatricopeptide repeat-containing protein At5g37570 [Gossypium raimondii] &gt;gi|763749140|gb|KJB16579.1| hypothetical protein B456_002G237700 [Gossypium raimondii]
GB_D01G2402	AT2G24280	GH_D01G2298	AT2G24280	alpha/beta-Hydrolases superfamily protein	Q5RBU7	PCP_PONAB Lysosomal Pro-X carboxypeptidase OS=Pongo abelii GN=PRCP PE=2 SV=1	A0A0D2RBM9	A0A0D2RBM9_GOSRA Uncharacterized protein OS=Gossypium raimondii GN=B456_002G237800 PE=4 SV=1	tcc:TCM_022732	Alpha	PF05577|Serine carboxypeptidase S28	IPR008758|Peptidase S28	biological_process:GO:0006508|proteolysis;molecular_function:GO:0008236|serine-type peptidase activity;	gi|823136765|ref|XP_012468151.1|	PREDICTED: lysosomal Pro-X carboxypeptidase-like [Gossypium raimondii] &gt;gi|763749141|gb|KJB16580.1| hypothetical protein B456_002G237800 [Gossypium raimondii]
GB_D01G2403	AT3G11580	GH_D01G2299	AT3G11580	AP2/B3-like transcriptional factor family protein	Q8RYD3	Y3158_ARATH B3 domain-containing protein At3g11580 OS=Arabidopsis thaliana GN=ARF32 PE=2 SV=1	A0A0D2QI58	A0A0D2QI58_GOSRA Uncharacterized protein OS=Gossypium raimondii GN=B456_002G237900 PE=4 SV=1	ath:AT1G13260	RAV1; AP2	PF02362|B3 DNA binding domain	IPR003340|B3 DNA binding domain	biological_process:GO:0006355|regulation of transcription, DNA-templated;cellular_component:GO:0005634|nucleus;molecular_function:GO:0003677|DNA binding;	gi|823136772|ref|XP_012468154.1|	PREDICTED: B3 domain-containing protein At2g36080-like [Gossypium raimondii] &gt;gi|763749147|gb|KJB16586.1| hypothetical protein B456_002G237900 [Gossypium raimondii]
GB_D01G2404	AT3G11570	GH_D01G2300	AT3G11570	TRICHOME BIREFRINGENCE-LIKE 8	Q9CAX1	TBL8_ARATH Protein trichome birefringence-like 8 OS=Arabidopsis thaliana GN=TBL8 PE=2 SV=1	A0A0D2NS45	A0A0D2NS45_GOSRA Uncharacterized protein (Fragment) OS=Gossypium raimondii GN=B456_002G2380002 PE=4 SV=1	-	-	PF13839|GDSL/SGNH-like Acyl-Esterase family found in Pmr5 and Cas1p	IPR025846|PMR5 N-terminal domain;IPR026057|PC-Esterase;IPR029962|Trichome birefringence-like family;IPR029977|Protein trichome birefringence-like 8-9	cellular_component:GO:0016021|integral component of membrane;	gi|823136770|ref|XP_012468153.1|	PREDICTED: protein trichome birefringence-like 8 isoform X2 [Gossypium raimondii]
GB_D01G2405	AT2G36130	GH_D01G2301	AT2G36130	Cyclophilin-like peptidyl-prolyl cis-trans isomerase family protein	Q9SIH1	CP18B_ARATH Peptidyl-prolyl cis-trans isomerase CYP18-2 OS=Arabidopsis thaliana GN=CYP18-2 PE=2 SV=1	A0A0D2QB66	A0A0D2QB66_GOSRA Peptidyl-prolyl cis-trans isomerase OS=Gossypium raimondii GN=B456_002G238100 PE=4 SV=1	tcc:TCM_022702	Cyclophilin-like peptidyl-prolyl cis-trans isomerase family protein; K12733 peptidyl-prolyl cis-trans isomerase-like 1 [EC:5.2.1.8]	PF00160|Cyclophilin type peptidyl-prolyl cis-trans isomerase/CLD	IPR002130|Cyclophilin-type peptidyl-prolyl cis-trans isomerase domain;IPR020892|Cyclophilin-type peptidyl-prolyl cis-trans isomerase, conserved site;IPR024936|Cyclophilin-type peptidyl-prolyl cis-trans isomerase	biological_process:GO:0000413|protein peptidyl-prolyl isomerization;GO:0006457|protein folding;cellular_component:GO:0005829|cytosol;molecular_function:GO:0003755|peptidyl-prolyl cis-trans isomerase activity;	gi|823136775|ref|XP_012468155.1|	PREDICTED: peptidyl-prolyl cis-trans isomerase CYP18-2 [Gossypium raimondii] &gt;gi|763749150|gb|KJB16589.1| hypothetical protein B456_002G238100 [Gossypium raimondii]
GB_D01G2406	AT5G22380	GH_D01G2302	AT5G22380	NAC domain containing protein 90	Q9FMR3	NAC90_ARATH NAC domain-containing protein 90 OS=Arabidopsis thaliana GN=NAC090 PE=2 SV=1	A0A0D2NS40	A0A0D2NS40_GOSRA Uncharacterized protein OS=Gossypium raimondii GN=B456_002G238300 PE=4 SV=1	fve:101312606	NAC domain-containing protein 66-like; K13126 polyadenylate-binding protein	PF02365|No apical meristem (NAM) protein	IPR003441|NAC domain	biological_process:GO:0006355|regulation of transcription, DNA-templated;cellular_component:GO:0005634|nucleus;molecular_function:GO:0003677|DNA binding;	gi|586637285|gb|AHJ79211.1|	NAC domain protein NAC70 [Gossypium hirsutum]
		GH_D01G2303	-	-	-	-	-	-	-	-	-	-	-	gi|823242404|ref|XP_012453884.1|	PREDICTED: uncharacterized protein LOC105775944 isoform X2 [Gossypium raimondii]
		GH_D01G2304	-	-	-	-	A0A0D2VBU9	A0A0D2VBU9_GOSRA Uncharacterized protein OS=Gossypium raimondii GN=B456_013G072000 PE=4 SV=1	-	-	-	-	-	gi|763813062|gb|KJB79914.1|	hypothetical protein B456_013G072000 [Gossypium raimondii]
		GH_D01G2305	-	-	-	-	A0A0D2MF64	A0A0D2MF64_GOSRA Uncharacterized protein (Fragment) OS=Gossypium raimondii GN=B456_002G238400 PE=4 SV=1	brp:103844293	long-chain-alcohol oxidase FAO1; K17756 long-chain-alcohol oxidase [EC:1.1.3.20]	PF00732|GMC oxidoreductase	IPR000172|Glucose-methanol-choline oxidoreductase, N-terminal	biological_process:GO:0055114|oxidation-reduction process;molecular_function:GO:0016614|oxidoreductase activity, acting on CH-OH group of donors;GO:0050660|flavin adenine dinucleotide binding;	gi|823138285|ref|XP_012469008.1|	PREDICTED: uncharacterized protein LOC105787108 [Gossypium raimondii]
GB_D01G2407	AT4G28570	GH_D01G2306	AT4G28570	Long-chain fatty alcohol dehydrogenase family protein	Q94BP3	FAO4B_ARATH Long-chain-alcohol oxidase FAO4B OS=Arabidopsis thaliana GN=FAO4B PE=2 SV=2	A0A0D2NS47	A0A0D2NS47_GOSRA Uncharacterized protein OS=Gossypium raimondii GN=B456_002G238500 PE=4 SV=1	csv:101220239	long-chain-alcohol oxidase FAO2-like; K17756 long-chain-alcohol oxidase [EC:1.1.3.20]	PF05199|GMC oxidoreductase	IPR007867|Glucose-methanol-choline oxidoreductase, C-terminal	-	gi|823138285|ref|XP_012469008.1|	PREDICTED: uncharacterized protein LOC105787108 [Gossypium raimondii]
		GH_D01G2307	AT3G52600	cell wall invertase 2	P26792	INV1_DAUCA Beta-fructofuranosidase, insoluble isoenzyme 1 OS=Daucus carota GN=INV1 PE=1 SV=1	A0A061ETD8	A0A061ETD8_THECC Cell wall invertase 2 OS=Theobroma cacao GN=TCM_022647 PE=3 SV=1	tcc:TCM_022647	Cell wall invertase 2; K01193 beta-fructofuranosidase [EC:3.2.1.26]	PF00251|Glycosyl hydrolases family 32 N-terminal domain	IPR001362|Glycoside hydrolase, family 32;IPR013148|Glycosyl hydrolase family 32, N-terminal;IPR013189|Glycosyl hydrolase family 32, C-terminal	biological_process:GO:0005975|carbohydrate metabolic process;molecular_function:GO:0004553|hydrolase activity, hydrolyzing O-glycosyl compounds;	gi|590632323|ref|XP_007027808.1|	Cell wall invertase 2 [Theobroma cacao] &gt;gi|508716413|gb|EOY08310.1| Cell wall invertase 2 [Theobroma cacao]
GB_D01G2408	AT2G36200	GH_D01G2308	AT2G36200	P-loop containing nucleoside triphosphate hydrolases superfamily protein	O23826	K125_TOBAC 125 kDa kinesin-related protein OS=Nicotiana tabacum GN=TKRP125 PE=1 SV=1	A0A0D2NS50	A0A0D2NS50_GOSRA Kinesin-like protein OS=Gossypium raimondii GN=B456_002G238800 PE=3 SV=1	tcc:TCM_022635	125 kDa kinesin-related protein isoform 1; K10398 kinesin family member 11	PF00225|Kinesin motor domain	IPR001752|Kinesin motor domain;IPR019821|Kinesin motor domain, conserved site;IPR027640|Kinesin-like protein	biological_process:GO:0007018|microtubule-based movement;molecular_function:GO:0005524|ATP binding;GO:0003777|microtubule motor activity;GO:0008017|microtubule binding;	gi|823136788|ref|XP_012468162.1|	PREDICTED: 125 kDa kinesin-related protein [Gossypium raimondii] &gt;gi|763749159|gb|KJB16598.1| hypothetical protein B456_002G238800 [Gossypium raimondii]
GB_D01G2409	AT2G23930	GH_D01G2309	AT2G23930	Putative small nuclear ribonucleoprotein G	O82221	RUXG_ARATH Probable small nuclear ribonucleoprotein G OS=Arabidopsis thaliana GN=At2g23930 PE=2 SV=1	A0A0D2QB72	A0A0D2QB72_GOSRA Uncharacterized protein OS=Gossypium raimondii GN=B456_002G238900 PE=4 SV=1	vvi:100247783	probable small nuclear ribonucleoprotein G; K11099 small nuclear ribonucleoprotein G	PF01423|LSM domain	IPR001163|LSM domain, eukaryotic/archaea-type	biological_process:GO:0000398|mRNA splicing, via spliceosome;cellular_component:GO:0071004|U2-type prespliceosome;GO:0034719|SMN-Sm protein complex;GO:0005685|U1 snRNP;GO:0071011|precatalytic spliceosome;GO:0071013|catalytic step 2 spliceosome;GO:0005687|U4 snRNP;GO:0005682|U5 snRNP;GO:0005689|U12-type spliceosomal complex;GO:0005686|U2 snRNP;GO:0097526|spliceosomal tri-snRNP complex;GO:0043186|P…	gi|823136790|ref|XP_012468163.1|	PREDICTED: probable small nuclear ribonucleoprotein G [Gossypium raimondii] &gt;gi|763749160|gb|KJB16599.1| hypothetical protein B456_002G238900 [Gossypium raimondii]
GB_D01G2410	AT5G22400	GH_D01G2310	AT5G22400	Rho GTPase activating protein with PAK-box/P21-Rho-binding domain-containing protein	Q9FMR1	RGAP1_ARATH Rho GTPase-activating protein 1 OS=Arabidopsis thaliana GN=ROPGAP1 PE=2 SV=1	A0A0D2QI69	A0A0D2QI69_GOSRA Uncharacterized protein OS=Gossypium raimondii GN=B456_002G239000 PE=4 SV=1	-	-	PF00620|RhoGAP domain	IPR000095|CRIB domain;IPR000198|Rho GTPase-activating protein domain	biological_process:GO:0007165|signal transduction;	gi|823136792|ref|XP_012468164.1|	PREDICTED: rho GTPase-activating protein 5-like [Gossypium raimondii] &gt;gi|763749162|gb|KJB16601.1| hypothetical protein B456_002G239000 [Gossypium raimondii] &gt;gi|763749163|gb|KJB16602.1| hypothetical protein B456_002G239000 [Gossypium raimondii]
GB_D01G2411	AT3G11470	GH_D01G2311	AT3G11470	4'-phosphopantetheinyl transferase superfamily	Q9CQF6	ADPPT_MOUSE L-aminoadipate-semialdehyde dehydrogenase-phosphopantetheinyl transferase OS=Mus musculus GN=Aasdhppt PE=1 SV=1	A0A0D2NS54	A0A0D2NS54_GOSRA Uncharacterized protein OS=Gossypium raimondii GN=B456_002G239100 PE=4 SV=1	tcc:TCM_022620	4'-phosphopantetheinyl transferase superfamily; K06133 4'-phosphopantetheinyl transferase [EC:2.7.8.-]	PF01648|4'-phosphopantetheinyl transferase superfamily	IPR008278|4'-phosphopantetheinyl transferase superfamily	biological_process:GO:0006633|fatty acid biosynthetic process;molecular_function:GO:0000287|magnesium ion binding;GO:0008897|holo-[acyl-carrier-protein] synthase activity;	gi|823136796|ref|XP_012468166.1|	PREDICTED: L-aminoadipate-semialdehyde dehydrogenase-phosphopantetheinyl transferase isoform X2 [Gossypium raimondii]
GB_D01G2412	AT3G52660	GH_D01G2312	AT3G52660	RNA-binding (RRM/RBD/RNP motifs) family protein	O60506	HNRPQ_HUMAN Heterogeneous nuclear ribonucleoprotein Q OS=Homo sapiens GN=SYNCRIP PE=1 SV=2	A0A0D2MF76	A0A0D2MF76_GOSRA Uncharacterized protein OS=Gossypium raimondii GN=B456_002G239200 PE=4 SV=1	tcc:TCM_022611	RNA-binding family protein isoform 1; K13161 heterogeneous nuclear ribonucleoprotein R	PF00076|RNA recognition motif. (a.k.a. RRM, RBD, or RNP domain)	IPR000504|RNA recognition motif domain;IPR003954|RNA recognition motif domain, eukaryote	molecular_function:GO:0003723|RNA binding;GO:0000166|nucleotide binding;	gi|823136798|ref|XP_012468167.1|	PREDICTED: heterogeneous nuclear ribonucleoprotein R [Gossypium raimondii] &gt;gi|823136800|ref|XP_012468168.1| PREDICTED: heterogeneous nuclear ribonucleoprotein R [Gossypium raimondii] &gt;gi|763749165|gb|KJB16604.1| hypothetical protein B456_002G239200 [Gossypium raimondii] &gt;gi|763749168|gb|KJB16607.1| hypothetical protein B456_002G239200 [Gossypium raimondii]
GB_D01G2413	AT3G01320	GH_D01G2313	AT3G01320	SIN3-like 1	Q9SRH9	SNL1_ARATH Paired amphipathic helix protein Sin3-like 1 OS=Arabidopsis thaliana GN=SNL1 PE=1 SV=2	A0A0D2NS57	A0A0D2NS57_GOSRA Uncharacterized protein OS=Gossypium raimondii GN=B456_002G239300 PE=4 SV=1	cit:102607961	paired amphipathic helix protein Sin3-like 2-like; K11644 paired amphipathic helix protein Sin3a	PF08295|Sin3 family co-repressor	IPR013194|Histone deacetylase interacting domain	-	gi|763749169|gb|KJB16608.1|	hypothetical protein B456_002G239300 [Gossypium raimondii]
GB_D01G2414	AT1G57790	GH_D01G2314	AT1G57790	F-box family protein	Q9FVS1	FBK23_ARATH F-box	A0A0D2MF80	A0A0D2MF80_GOSRA Uncharacterized protein OS=Gossypium raimondii GN=B456_002G239400 PE=4 SV=1	mdm:103429118	uncharacterized LOC103429118; K14843 pescadillo	PF12937|F-box-like	IPR001810|F-box domain	-	gi|823136804|ref|XP_012468170.1|	PREDICTED: F-box
GB_D01G2415	-
GB_D01G2416	AT3G52710	GH_D01G2315	AT3G52710	hypothetical protein	-	-	A0A0D2QB81	A0A0D2QB81_GOSRA Uncharacterized protein OS=Gossypium raimondii GN=B456_002G239600 PE=4 SV=1	-	-	-	-	-	gi|823136806|ref|XP_012468171.1|	PREDICTED: uncharacterized protein LOC105786340 [Gossypium raimondii] &gt;gi|763749175|gb|KJB16614.1| hypothetical protein B456_002G239600 [Gossypium raimondii]
GB_D01G2417	AT5G03880	GH_D01G2316	AT5G03880	Thioredoxin family protein	-	-	A0A0D2RBR7	A0A0D2RBR7_GOSRA Uncharacterized protein OS=Gossypium raimondii GN=B456_002G239700 PE=4 SV=1	mus:103978491	uncharacterized protein LOC103978491 isoform X1; K03354 anaphase-promoting complex subunit 7	PF13417|Glutathione S-transferase, N-terminal domain	IPR004045|Glutathione S-transferase, N-terminal	biological_process:GO:0055114|oxidation-reduction process;GO:0006749|glutathione metabolic process;GO:0045454|cell redox homeostasis;cellular_component:GO:0009941|chloroplast envelope;GO:0016021|integral component of membrane;GO:0009535|chloroplast thylakoid membrane;molecular_function:GO:0009055|electron carrier activity;GO:0015035|protein disulfide oxidoreductase activity;GO:0004364|glutathione…	gi|823136808|ref|XP_012468172.1|	PREDICTED: uncharacterized protein LOC105786341 [Gossypium raimondii] &gt;gi|763749176|gb|KJB16615.1| hypothetical protein B456_002G239700 [Gossypium raimondii] &gt;gi|763749178|gb|KJB16617.1| hypothetical protein B456_002G239700 [Gossypium raimondii]
GB_D01G2418	AT3G10120	GH_D01G2317	AT3G10120	hypothetical protein	-	-	A0A0D2NS61	A0A0D2NS61_GOSRA Uncharacterized protein OS=Gossypium raimondii GN=B456_002G239800 PE=4 SV=1	-	-	PF14009|Domain of unknown function (DUF4228)	IPR025322|Protein of unknown function DUF4228, plant	-	gi|823138654|ref|XP_012469167.1|	PREDICTED: uncharacterized protein LOC105787357 [Gossypium raimondii] &gt;gi|763749179|gb|KJB16618.1| hypothetical protein B456_002G239800 [Gossypium raimondii]
GB_D01G2419	AT5G03905	GH_D01G2318	AT5G03905	Iron-sulfur cluster biosynthesis family protein	Q8LCY2	ISAM2_ARATH Iron-sulfur assembly protein IscA-like 2, mitochondrial OS=Arabidopsis thaliana GN=At5g03905 PE=2 SV=2	A0A0D2QB85	A0A0D2QB85_GOSRA Uncharacterized protein OS=Gossypium raimondii GN=B456_002G239900 PE=4 SV=1	obr:102704199	iron-sulfur assembly protein IscA-like 1, mitochondrial-like; K13628 iron-sulfur cluster assembly protein	PF01521|Iron-sulphur cluster biosynthesis	IPR000361|FeS cluster biogenesis	biological_process:GO:0016226|iron-sulfur cluster assembly;molecular_function:GO:0051536|iron-sulfur cluster binding;GO:0005198|structural molecule activity;	gi|823136816|ref|XP_012468177.1|	PREDICTED: iron-sulfur assembly protein IscA-like 2, mitochondrial isoform X2 [Gossypium raimondii] &gt;gi|763749180|gb|KJB16619.1| hypothetical protein B456_002G239900 [Gossypium raimondii]
		GH_D01G2319	AT3G52730	ubiquinol-cytochrome C reductase UQCRX/QCR9-like family protein	P46270	QCR9_SOLTU Cytochrome b-c1 complex subunit 9 OS=Solanum tuberosum PE=1 SV=1	A0A0D2QI87	A0A0D2QI87_GOSRA Uncharacterized protein OS=Gossypium raimondii GN=B456_002G240000 PE=4 SV=1	mdm:103408328	cytochrome b-c1 complex subunit 9-like; K00419 ubiquinol-cytochrome c reductase subunit 9	PF05365|Ubiquinol-cytochrome C reductase, UQCRX/QCR9 like	IPR008027|Cytochrome b-c1 complex subunit 9	biological_process:GO:0006122|mitochondrial electron transport, ubiquinol to cytochrome c;cellular_component:GO:0005750|mitochondrial respiratory chain complex III;	gi|823136820|ref|XP_012468179.1|	PREDICTED: cytochrome b-c1 complex subunit 9-like [Gossypium raimondii] &gt;gi|763749181|gb|KJB16620.1| hypothetical protein B456_002G240000 [Gossypium raimondii] &gt;gi|763749182|gb|KJB16621.1| hypothetical protein B456_002G240000 [Gossypium raimondii]
GB_D01G2420	AT3G52740	GH_D01G2320	AT3G52740	hypothetical protein	-	-	A0A0D2RAA6	A0A0D2RAA6_GOSRA Uncharacterized protein OS=Gossypium raimondii GN=B456_002G240200 PE=4 SV=1	-	-	-	-	-	gi|823136818|ref|XP_012468178.1|	PREDICTED: uncharacterized protein LOC105786345 [Gossypium raimondii] &gt;gi|763748676|gb|KJB16115.1| hypothetical protein B456_002G240200 [Gossypium raimondii]
GB_D01G2421	AT4G33170	GH_D01G2321	AT4G33170	Tetratricopeptide repeat (TPR)-like superfamily protein	Q9SMZ2	PP347_ARATH Pentatricopeptide repeat-containing protein At4g33170 OS=Arabidopsis thaliana GN=PCMP-H53 PE=3 SV=1	A0A0D2RBS9	A0A0D2RBS9_GOSRA Uncharacterized protein OS=Gossypium raimondii GN=B456_002G240300 PE=4 SV=1	vvi:100250295	uncharacterized LOC100250295; K03452 magnesium	PF13041|PPR repeat family	IPR002885|Pentatricopeptide repeat;IPR032867|DYW domain	molecular_function:GO:0008270|zinc ion binding;	gi|823136822|ref|XP_012468180.1|	PREDICTED: pentatricopeptide repeat-containing protein At4g33170-like [Gossypium raimondii] &gt;gi|763749186|gb|KJB16625.1| hypothetical protein B456_002G240300 [Gossypium raimondii]
GB_D01G2422	AT2G36250	GH_D01G2322	AT2G36250	Tubulin/FtsZ family protein	O82533	FTZ21_ARATH Cell division protein FtsZ homolog 2-1, chloroplastic OS=Arabidopsis thaliana GN=FTSZ2-1 PE=1 SV=2	A0A0D2MF94	A0A0D2MF94_GOSRA Uncharacterized protein OS=Gossypium raimondii GN=B456_002G240400 PE=3 SV=1	tcc:TCM_022580	Tubulin	PF00091|Tubulin/FtsZ family, GTPase domain	IPR003008|Tubulin/FtsZ, GTPase domain;IPR018316|Tubulin/FtsZ, 2-layer sandwich domain;IPR020805|Cell division protein FtsZ, conserved site;IPR024757|Cell division protein FtsZ, C-terminal	cellular_component:GO:0005737|cytoplasm;molecular_function:GO:0003924|GTPase activity;GO:0005525|GTP binding;	gi|823136824|ref|XP_012468182.1|	PREDICTED: cell division protein FtsZ homolog 2-1, chloroplastic-like isoform X1 [Gossypium raimondii] &gt;gi|763749188|gb|KJB16627.1| hypothetical protein B456_002G240400 [Gossypium raimondii]
GB_D01G2423	AT2G36270	GH_D01G2323	AT2G36270	Basic-leucine zipper (bZIP) transcription factor family protein	Q9SJN0	ABI5_ARATH Protein ABSCISIC ACID-INSENSITIVE 5 OS=Arabidopsis thaliana GN=ABI5 PE=1 SV=1	A0A0D2QI93	A0A0D2QI93_GOSRA Uncharacterized protein OS=Gossypium raimondii GN=B456_002G240500 PE=4 SV=1	csv:101209887	protein ABSCISIC ACID-INSENSITIVE 5; K14432 ABA responsive element binding factor	PF00170|bZIP transcription factor	IPR004827|Basic-leucine zipper domain;IPR029803|Protein ABSCISIC ACID-INSENSITIVE 5	biological_process:GO:0009737|response to abscisic acid;GO:0010187|negative regulation of seed germination;GO:0045893|positive regulation of transcription, DNA-templated;GO:0048316|seed development;cellular_component:GO:0005634|nucleus;molecular_function:GO:0003700|transcription factor activity, sequence-specific DNA binding;GO:0043565|sequence-specific DNA binding;	gi|823136831|ref|XP_012468185.1|	PREDICTED: protein ABSCISIC ACID-INSENSITIVE 5-like isoform X2 [Gossypium raimondii] &gt;gi|763749191|gb|KJB16630.1| hypothetical protein B456_002G240500 [Gossypium raimondii] &gt;gi|763749192|gb|KJB16631.1| hypothetical protein B456_002G240500 [Gossypium raimondii]
GB_D01G2424	AT2G36295	GH_D01G2324	AT2G36295	hypothetical protein	-	-	A0A0D2MFA0	A0A0D2MFA0_GOSRA Uncharacterized protein OS=Gossypium raimondii GN=B456_002G240600 PE=4 SV=1	-	-	-	-	-	gi|763749193|gb|KJB16632.1|	hypothetical protein B456_002G240600 [Gossypium raimondii]
GB_D01G2425	AT3G52760	GH_D01G2325	AT3G52760	Integral membrane Yip1 family protein	Q9JIM5	YIPF7_MOUSE Protein YIPF7 OS=Mus musculus GN=Yipf7 PE=2 SV=1	A0A0D2NS69	A0A0D2NS69_GOSRA Protein YIPF OS=Gossypium raimondii GN=B456_002G240700 PE=3 SV=1	-	-	PF04893|Yip1 domain	IPR006977|Yip1 domain	cellular_component:GO:0016021|integral component of membrane;	gi|823136833|ref|XP_012468186.1|	PREDICTED: protein YIPF5 homolog [Gossypium raimondii] &gt;gi|763749194|gb|KJB16633.1| hypothetical protein B456_002G240700 [Gossypium raimondii]
GB_D01G2426	AT3G52770	GH_D01G2326	AT3G52770	binding protein	Q56WL5	ZPR4_ARATH Protein LITTLE ZIPPER 4 OS=Arabidopsis thaliana GN=ZPR4 PE=1 SV=1	A0A0D2QB97	A0A0D2QB97_GOSRA Uncharacterized protein OS=Gossypium raimondii GN=B456_002G240800 PE=4 SV=1	-	-	-	-	biological_process:GO:0010073|meristem maintenance;GO:0003002|regionalization;GO:0050789|regulation of biological process;	gi|763749195|gb|KJB16634.1|	hypothetical protein B456_002G240800 [Gossypium raimondii]
GB_D01G2427	AT3G52820
GB_D01G2428	AT2G36320	GH_D01G2327	AT2G36320	A20/AN1-like zinc finger family protein	Q9SJM6	SAP4_ARATH Zinc finger A20 and AN1 domain-containing stress-associated protein 4 OS=Arabidopsis thaliana GN=SAP4 PE=1 SV=1	A0A0D2RBT9	A0A0D2RBT9_GOSRA Uncharacterized protein OS=Gossypium raimondii GN=B456_002G240900 PE=4 SV=1	mtr:MTR_051s0004	1-acyl-sn-glycerol-3-phosphate acyltransferase; K13523 lysophosphatidic acid acyltransferase	PF01428|AN1-like Zinc finger	IPR000058|Zinc finger, AN1-type;IPR002653|Zinc finger, A20-type	molecular_function:GO:0008270|zinc ion binding;GO:0003677|DNA binding;	gi|823136835|ref|XP_012468187.1|	PREDICTED: zinc finger A20 and AN1 domain-containing stress-associated protein 6-like [Gossypium raimondii] &gt;gi|823136837|ref|XP_012468188.1| PREDICTED: zinc finger A20 and AN1 domain-containing stress-associated protein 6-like [Gossypium raimondii] &gt;gi|763749196|gb|KJB16635.1| hypothetical protein B456_002G240900 [Gossypium raimondii] &gt;gi|763749197|gb|KJB16636.1| hypothetical protein B4…
GB_D01G2429	AT5G03610	GH_D01G2328	AT5G03610	GDSL-like Lipase/Acylhydrolase superfamily protein	Q9LZS7	GDL71_ARATH GDSL esterase	A0A0D2NS70	A0A0D2NS70_GOSRA Uncharacterized protein OS=Gossypium raimondii GN=B456_002G241000 PE=4 SV=1	aly:ARALYDRAFT_316517	T4O12.15; K01188 beta-glucosidase [EC:3.2.1.21]	PF00657|GDSL-like Lipase/Acylhydrolase	IPR001087|GDSL lipase/esterase	molecular_function:GO:0016788|hydrolase activity, acting on ester bonds;	gi|823136839|ref|XP_012468189.1|	PREDICTED: GDSL esterase
GB_D01G2430	-
GB_D01G2431	AT2G27690	GH_D01G2329	AT2G27690	cytochrome P450%2C family 94%2C subfamily C%2C polypeptide 1	Q9ZUX1	C94C1_ARATH Cytochrome P450 94C1 OS=Arabidopsis thaliana GN=CYP94C1 PE=2 SV=1	A0A0D2QBA1	A0A0D2QBA1_GOSRA Uncharacterized protein OS=Gossypium raimondii GN=B456_002G241100 PE=3 SV=1	vvi:100259592	cytochrome P450 94A1-like; K13407 fatty acid omega-hydroxylase [EC:1.14.-.-]	PF00067|Cytochrome P450	IPR001128|Cytochrome P450;IPR002401|Cytochrome P450, E-class, group I	biological_process:GO:0055114|oxidation-reduction process;cellular_component:GO:0016021|integral component of membrane;molecular_function:GO:0016705|oxidoreductase activity, acting on paired donors, with incorporation or reduction of molecular oxygen;GO:0020037|heme binding;GO:0005506|iron ion binding;GO:0004497|monooxygenase activity;	gi|763749200|gb|KJB16639.1|	hypothetical protein B456_002G241100 [Gossypium raimondii]
GB_D01G2432	AT3G44590	GH_D01G2330	AT3G44590	60S acidic ribosomal protein family	O24415	RLA2B_MAIZE 60S acidic ribosomal protein P2B OS=Zea mays GN=RPP2B PE=1 SV=1	A0A0D2QPN4	A0A0D2QPN4_GOSRA Uncharacterized protein OS=Gossypium raimondii GN=B456_004G009000 PE=3 SV=1	tcc:TCM_022507	60S acidic ribosomal protein P2-4; K02943 large subunit ribosomal protein LP2	PF00428|60s Acidic ribosomal protein	-	biological_process:GO:0006414|translational elongation;cellular_component:GO:0005840|ribosome;molecular_function:GO:0003735|structural constituent of ribosome;	gi|823145903|ref|XP_012472831.1|	PREDICTED: 60S acidic ribosomal protein P2-1-like [Gossypium raimondii] &gt;gi|823145905|ref|XP_012472832.1| PREDICTED: 60S acidic ribosomal protein P2-1-like [Gossypium raimondii] &gt;gi|763754358|gb|KJB21689.1| hypothetical protein B456_004G009000 [Gossypium raimondii]
GB_D01G2433	AT3G52880	GH_D01G2331	AT3G52880	monodehydroascorbate reductase 1	Q43497	MDAR_SOLLC Monodehydroascorbate reductase OS=Solanum lycopersicum GN=AFRR PE=1 SV=1	A0A0D2NS76	A0A0D2NS76_GOSRA Uncharacterized protein OS=Gossypium raimondii GN=B456_002G241300 PE=4 SV=1	vvi:100233035	monodehydroascorbate reductase (EC:1.6.5.4); K08232 monodehydroascorbate reductase (NADH) [EC:1.6.5.4]	PF07992|Pyridine nucleotide-disulphide oxidoreductase	IPR023753|FAD/NAD(P)-binding domain	biological_process:GO:0055114|oxidation-reduction process;molecular_function:GO:0050660|flavin adenine dinucleotide binding;GO:0016491|oxidoreductase activity;	gi|823136845|ref|XP_012468192.1|	PREDICTED: monodehydroascorbate reductase-like [Gossypium raimondii] &gt;gi|763749209|gb|KJB16648.1| hypothetical protein B456_002G241300 [Gossypium raimondii]
GB_D01G2434	AT5G03650	GH_D01G2332	AT5G03650	starch branching enzyme 2.2	Q41058	GLGB1_PEA 1,4-alpha-glucan-branching enzyme 1, chloroplastic	A0A0D2RBV8	A0A0D2RBV8_GOSRA Uncharacterized protein OS=Gossypium raimondii GN=B456_002G241400 PE=4 SV=1	tcc:TCM_022491	Starch branching enzyme 2.1 isoform 1; K00700 1,4-alpha-glucan branching enzyme [EC:2.4.1.18]	PF02922|Carbohydrate-binding module 48 (Isoamylase N-terminal domain)	IPR004193|Glycoside hydrolase, family 13, N-terminal;IPR006047|Glycosyl hydrolase, family 13, catalytic domain;IPR006048|Alpha-amylase/branching enzyme, C-terminal all beta;IPR015902|Glycoside hydrolase, family 13	biological_process:GO:0005978|glycogen biosynthetic process;molecular_function:GO:0003844|1,4-alpha-glucan branching enzyme activity;GO:0004553|hydrolase activity, hydrolyzing O-glycosyl compounds;GO:0043169|cation binding;	gi|823136841|ref|XP_012468190.1|	PREDICTED: 1,4-alpha-glucan-branching enzyme 2-2, chloroplastic
GB_D01G2435	AT2G36410	GH_D01G2333	AT2G36410	transcriptional activator (DUF662)	-	-	A0A0D2NR29	A0A0D2NR29_GOSRA Uncharacterized protein OS=Gossypium raimondii GN=B456_002G241500 PE=4 SV=1	brp:103868514	ATP-dependent 6-phosphofructokinase 5, chloroplastic-like; K00850 6-phosphofructokinase 1 [EC:2.7.1.11]	PF04949|Transcriptional activator	IPR007033|RAB6-interacting golgin	-	gi|823136849|ref|XP_012468194.1|	PREDICTED: structural maintenance of chromosomes protein 1A-like isoform X1 [Gossypium raimondii] &gt;gi|763748694|gb|KJB16133.1| hypothetical protein B456_002G241500 [Gossypium raimondii]
GB_D01G2436	AT5G03670	GH_D01G2334	AT5G03670	histone-lysine N-methyltransferase SETD1B-like protein	-	-	A0A0D2QIC0	A0A0D2QIC0_GOSRA Uncharacterized protein OS=Gossypium raimondii GN=B456_002G241600 PE=4 SV=1	-	-	PF14309|Domain of unknown function (DUF4378)	IPR025486|Domain of unknown function DUF4378	-	gi|823136853|ref|XP_012468198.1|	PREDICTED: zinc-regulated protein 8-like [Gossypium raimondii] &gt;gi|763749227|gb|KJB16666.1| hypothetical protein B456_002G241600 [Gossypium raimondii]
GB_D01G2437	AT1G51690
GB_D01G2438	AT4G25490	GH_D01G2335	AT4G25490	C-repeat/DRE binding factor 1	P93835	DRE1B_ARATH Dehydration-responsive element-binding protein 1B OS=Arabidopsis thaliana GN=DREB1B PE=2 SV=2	A0A0D2Q3G9	A0A0D2Q3G9_GOSRA Uncharacterized protein OS=Gossypium raimondii GN=B456_002G241700 PE=4 SV=1	mdm:103453940	dehydration-responsive element-binding protein 1D-like; K09286 EREBP-like factor	PF00847|AP2 domain	IPR001471|AP2/ERF domain	biological_process:GO:0006355|regulation of transcription, DNA-templated;cellular_component:GO:0005634|nucleus;molecular_function:GO:0003677|DNA binding;GO:0003700|transcription factor activity, sequence-specific DNA binding;	gi|823138657|ref|XP_012469168.1|	PREDICTED: dehydration-responsive element-binding protein 1F-like [Gossypium raimondii] &gt;gi|763746465|gb|KJB13904.1| hypothetical protein B456_002G241700 [Gossypium raimondii]
		GH_D01G2336	-	-	-	-	A0A0B0PT07	A0A0B0PT07_GOSAR ATP-dependent helicase	-	-	-	-	-	gi|728847098|gb|KHG26541.1|	ATP-dependent helicase
		GH_D01G2337	-	-	-	-	W9QZW5	W9QZW5_9ROSA Uncharacterized protein OS=Morus notabilis GN=L484_022158 PE=4 SV=1	-	-	-	-	-	gi|823201339|ref|XP_012435533.1|	PREDICTED: putative cell wall protein [Gossypium raimondii]
GB_D01G2439	AT2G36450	GH_D01G2338	AT2G36450	Integrase-type DNA-binding superfamily protein	Q9SJR0	ERF24_ARATH Ethylene-responsive transcription factor ERF024 OS=Arabidopsis thaliana GN=ERF024 PE=2 SV=1	A0A0D2MB36	A0A0D2MB36_GOSRA Uncharacterized protein OS=Gossypium raimondii GN=B456_002G241800 PE=4 SV=1	sly:543826	CBF1, LeCBF1; CBF1 protein; K09286 EREBP-like factor	PF00847|AP2 domain	IPR001471|AP2/ERF domain	biological_process:GO:0006355|regulation of transcription, DNA-templated;cellular_component:GO:0005634|nucleus;molecular_function:GO:0003677|DNA binding;GO:0003700|transcription factor activity, sequence-specific DNA binding;	gi|823138287|ref|XP_012469009.1|	PREDICTED: ethylene-responsive transcription factor ERF024-like [Gossypium raimondii] &gt;gi|763747408|gb|KJB14847.1| hypothetical protein B456_002G241800 [Gossypium raimondii]
		GH_D01G2339	-	-	-	-	A0A0D2QBA7	A0A0D2QBA7_GOSRA Uncharacterized protein OS=Gossypium raimondii GN=B456_002G241900 PE=4 SV=1	tcc:TCM_030880	hypothetical protein; K03469 ribonuclease HI [EC:3.1.26.4]	PF13456|Reverse transcriptase-like	-	-	gi|763749210|gb|KJB16649.1|	hypothetical protein B456_002G241900 [Gossypium raimondii]
GB_D01G2440	-
GB_D01G2441	-
GB_D01G2442	AT5G03680	GH_D01G2340	AT5G03680	Duplicated homeodomain-like superfamily protein	Q9LZS0	PTL_ARATH Trihelix transcription factor PTL OS=Arabidopsis thaliana GN=PTL PE=2 SV=1	A0A0B0PV67	A0A0B0PV67_GOSAR Trihelix transcription factor GT-2-like protein OS=Gossypium arboreum GN=F383_13096 PE=4 SV=1	-	-	PF13837|Myb/SANT-like DNA-binding domain	IPR001005|SANT/Myb domain;IPR017877|Myb-like domain	-	gi|728847838|gb|KHG27281.1|	Trihelix transcription factor GT-2 -like protein [Gossypium arboreum]
GB_D01G2443	AT2G36460	GH_D01G2341	AT2G36460	Aldolase superfamily protein	P17784	ALF_ORYSJ Fructose-bisphosphate aldolase cytoplasmic isozyme OS=Oryza sativa subsp. japonica GN=FBA PE=1 SV=2	A0A0D2QBC2	A0A0D2QBC2_GOSRA Fructose-bisphosphate aldolase OS=Gossypium raimondii GN=B456_002G242100 PE=3 SV=1	tcc:TCM_022455	Aldolase superfamily protein isoform 1; K01623 fructose-bisphosphate aldolase, class I [EC:4.1.2.13]	PF00274|Fructose-bisphosphate aldolase class-I	IPR000741|Fructose-bisphosphate aldolase, class-I;IPR029768|Fructose-bisphosphate aldolase class-I active site	biological_process:GO:0006096|glycolytic process;molecular_function:GO:0004332|fructose-bisphosphate aldolase activity;	gi|823136857|ref|XP_012468200.1|	PREDICTED: fructose-bisphosphate aldolase cytoplasmic isozyme [Gossypium raimondii] &gt;gi|763749230|gb|KJB16669.1| hypothetical protein B456_002G242100 [Gossypium raimondii]
GB_D01G2444	AT3G44735	GH_D01G2342	AT2G27770	DUF868 family protein (DUF868)	-	-	A0A0D2RBW8	A0A0D2RBW8_GOSRA Uncharacterized protein OS=Gossypium raimondii GN=B456_002G242200 PE=4 SV=1	cam:101493596	kinesin KP1-like; K10406 kinesin family member C2	PF05910|Plant protein of unknown function (DUF868)	IPR008586|Protein of unknown function DUF868, plant	-	gi|823136859|ref|XP_012468201.1|	PREDICTED: uncharacterized protein LOC105786362 [Gossypium raimondii] &gt;gi|763749231|gb|KJB16670.1| hypothetical protein B456_002G242200 [Gossypium raimondii]
GB_D01G2445	AT3G44735	GH_D01G2343	AT3G44735	PHYTOSULFOKINE 3 PRECURSOR	O81277	PSK5_ORYSJ Phytosulfokines 5 OS=Oryza sativa subsp. japonica GN=PSK5 PE=1 SV=1	A0A0D2MFC9	A0A0D2MFC9_GOSRA Uncharacterized protein OS=Gossypium raimondii GN=B456_002G242400 PE=4 SV=1	-	-	PF06404|Phytosulfokine precursor protein (PSK)	IPR009438|Phytosulfokine	biological_process:GO:0008283|cell proliferation;cellular_component:GO:0005576|extracellular region;molecular_function:GO:0008083|growth factor activity;	gi|823136869|ref|XP_012468207.1|	PREDICTED: putative phytosulfokines 6 isoform X2 [Gossypium raimondii] &gt;gi|763749233|gb|KJB16672.1| hypothetical protein B456_002G242400 [Gossypium raimondii]
		GH_D01G2344	AT3G44735	PHYTOSULFOKINE 3 PRECURSOR	Q8LA14	PSK6_ARATH Putative phytosulfokines 6 OS=Arabidopsis thaliana GN=PSK6 PE=2 SV=2	A0A0D2NS90	A0A0D2NS90_GOSRA Uncharacterized protein OS=Gossypium raimondii GN=B456_002G242500 PE=4 SV=1	-	-	PF06404|Phytosulfokine precursor protein (PSK)	IPR009438|Phytosulfokine	biological_process:GO:0008283|cell proliferation;cellular_component:GO:0005576|extracellular region;molecular_function:GO:0008083|growth factor activity;	gi|728830152|gb|KHG09595.1|	Putative phytosulfokines 6 -like protein [Gossypium arboreum]
GB_D01G2446	AT3G23620	GH_D01G2345	AT3G23620	Ribosomal RNA processing Brix domain protein	Q9LUG5	RPF2_ARATH Ribosome production factor 2 homolog OS=Arabidopsis thaliana GN=At3g23620 PE=2 SV=1	A0A0D2RBX2	A0A0D2RBX2_GOSRA Uncharacterized protein OS=Gossypium raimondii GN=B456_002G242600 PE=4 SV=1	tcc:TCM_022447	Ribosomal RNA processing Brix domain protein; K14847 ribosome production factor 2	PF04427|Brix domain	IPR007109|Brix domain	cellular_component:GO:0005730|nucleolus;	gi|823136865|ref|XP_012468205.1|	PREDICTED: ribosome production factor 2 homolog [Gossypium raimondii] &gt;gi|763749236|gb|KJB16675.1| hypothetical protein B456_002G242600 [Gossypium raimondii]
GB_D01G2447	AT3G52940	GH_D01G2346	AT3G52940	Ergosterol biosynthesis ERG4/ERG24 family	Q9LDR4	ERG24_ARATH Delta(14)-sterol reductase OS=Arabidopsis thaliana GN=FK PE=1 SV=2	A0A0D2QIC8	A0A0D2QIC8_GOSRA Uncharacterized protein OS=Gossypium raimondii GN=B456_002G242700 PE=4 SV=1	cam:101512523	delta(14)-sterol reductase; K00222 delta14-sterol reductase [EC:1.3.1.70]	PF01222|Ergosterol biosynthesis ERG4/ERG24 family	IPR001171|Ergosterol biosynthesis ERG4/ERG24;IPR018083|Sterol reductase, conserved site	biological_process:GO:0055114|oxidation-reduction process;cellular_component:GO:0016021|integral component of membrane;molecular_function:GO:0050613|delta14-sterol reductase activity;	gi|823136861|ref|XP_012468202.1|	PREDICTED: delta(14)-sterol reductase isoform X1 [Gossypium raimondii] &gt;gi|763749237|gb|KJB16676.1| hypothetical protein B456_002G242700 [Gossypium raimondii]
GB_D01G2448	AT5G03740	GH_D01G2347	AT5G03740	histone deacetylase 2C	Q9LZR5	HDT3_ARATH Histone deacetylase HDT3 OS=Arabidopsis thaliana GN=HDT3 PE=1 SV=2	A0A0D2QJU8	A0A0D2QJU8_GOSRA Uncharacterized protein OS=Gossypium raimondii GN=B456_002G243000 PE=4 SV=1	jcu:105637357	histone deacetylase HDT1-like; K11276 nucleophosmin 1	-	IPR007087|Zinc finger, C2H2;IPR015880|Zinc finger, C2H2-like	biological_process:GO:0009414|response to water deprivation;GO:0045892|negative regulation of transcription, DNA-templated;GO:0009651|response to salt stress;cellular_component:GO:0005730|nucleolus;molecular_function:GO:0046872|metal ion binding;	gi|763749762|gb|KJB17201.1|	hypothetical protein B456_002G243000 [Gossypium raimondii]
GB_D01G2449	AT2G36530	GH_D01G2348	AT2G36530	Enolase	P42896	ENO_RICCO Enolase OS=Ricinus communis PE=2 SV=1	A0A0D2NS93	A0A0D2NS93_GOSRA Uncharacterized protein OS=Gossypium raimondii GN=B456_002G243100 PE=3 SV=1	tcc:TCM_022427	Enolase; K01689 enolase [EC:4.2.1.11]	PF03952|Enolase, N-terminal domain	IPR000941|Enolase;IPR020809|Enolase, conserved site;IPR020810|Enolase, C-terminal TIM barrel domain;IPR020811|Enolase, N-terminal	-	gi|728833744|gb|KHG13187.1|	Enolase 1 [Gossypium arboreum]
GB_D01G2450	AT3G52960	GH_D01G2349	AT3G52960	Thioredoxin superfamily protein	Q949U7	PRX2E_ARATH Peroxiredoxin-2E, chloroplastic OS=Arabidopsis thaliana GN=PRXIIE PE=1 SV=2	A0A0D2MFE0	A0A0D2MFE0_GOSRA Uncharacterized protein OS=Gossypium raimondii GN=B456_002G243200 PE=4 SV=1	ath:AT1G60740	peroxiredoxin-2D; K03386 peroxiredoxin (alkyl hydroperoxide reductase subunit C) [EC:1.11.1.15]	PF08534|Redoxin	IPR013740|Redoxin;IPR013766|Thioredoxin domain	biological_process:GO:0098869|cellular oxidant detoxification;GO:0055114|oxidation-reduction process;molecular_function:GO:0051920|peroxiredoxin activity;GO:0004601|peroxidase activity;	gi|823136882|ref|XP_012468214.1|	PREDICTED: peroxiredoxin-2E, chloroplastic [Gossypium raimondii] &gt;gi|763749248|gb|KJB16687.1| hypothetical protein B456_002G243200 [Gossypium raimondii]
GB_D01G2451	AT5G12100	GH_D01G2350	AT5G12100	pentatricopeptide (PPR) repeat-containing protein	Q9FMQ1	PP376_ARATH Pentatricopeptide repeat-containing protein At5g12100, mitochondrial OS=Arabidopsis thaliana GN=At5g12100 PE=2 SV=1	A0A0D2NS98	A0A0D2NS98_GOSRA Uncharacterized protein OS=Gossypium raimondii GN=B456_002G243300 PE=4 SV=1	egu:105032139	pentatricopeptide repeat-containing protein At5g12100, mitochondrial-like; K17710 pentatricopeptide repeat domain-containing protein 1	PF01535|PPR repeat	IPR002885|Pentatricopeptide repeat	molecular_function:GO:0008270|zinc ion binding;	gi|823136880|ref|XP_012468213.1|	PREDICTED: pentatricopeptide repeat-containing protein At5g12100, mitochondrial [Gossypium raimondii] &gt;gi|763749249|gb|KJB16688.1| hypothetical protein B456_002G243300 [Gossypium raimondii]
GB_D01G2452	AT5G03760	GH_D01G2351	AT5G03760	Nucleotide-diphospho-sugar transferases superfamily protein	Q9LZR3	CSLA9_ARATH Glucomannan 4-beta-mannosyltransferase 9 OS=Arabidopsis thaliana GN=CSLA9 PE=2 SV=1	A0A0D2NSA3	A0A0D2NSA3_GOSRA Uncharacterized protein OS=Gossypium raimondii GN=B456_002G243400 PE=4 SV=1	tcc:TCM_022423	Nucleotide-diphospho-sugar transferases superfamily protein isoform 1; K13680 beta-mannan synthase [EC:2.4.1.32]	PF13641|Glycosyltransferase like family 2	-	cellular_component:GO:0016021|integral component of membrane;molecular_function:GO:0016740|transferase activity;	gi|823136884|ref|XP_012468215.1|	PREDICTED: glucomannan 4-beta-mannosyltransferase 9 [Gossypium raimondii] &gt;gi|763749259|gb|KJB16698.1| hypothetical protein B456_002G243400 [Gossypium raimondii] &gt;gi|763749260|gb|KJB16699.1| hypothetical protein B456_002G243400 [Gossypium raimondii]
GB_D01G2453	AT5G04550	GH_D01G2352	AT5G04550	type-1 restriction enzyme mjaxp r protein (DUF668)	-	-	A0A0D2RBZ7	A0A0D2RBZ7_GOSRA Uncharacterized protein OS=Gossypium raimondii GN=B456_002G243500 PE=4 SV=1	-	-	PF05003|Protein of unknown function (DUF668)	IPR007700|Protein of unknown function DUF668;IPR021864|Protein of unknown function DUF3475	-	gi|823136886|ref|XP_012468216.1|	PREDICTED: uncharacterized protein LOC105786374 [Gossypium raimondii] &gt;gi|763749261|gb|KJB16700.1| hypothetical protein B456_002G243500 [Gossypium raimondii] &gt;gi|763749262|gb|KJB16701.1| hypothetical protein B456_002G243500 [Gossypium raimondii] &gt;gi|763749263|gb|KJB16702.1| hypothetical protein B456_002G243500 [Gossypium raimondii]
GB_D01G2454	AT2G36570	GH_D01G2353	AT2G36570	Leucine-rich repeat protein kinase family protein	Q9SJQ1	PXC1_ARATH Leucine-rich repeat receptor-like protein kinase PXC1 OS=Arabidopsis thaliana GN=PXC1 PE=2 SV=1	A0A0D2NSA7	A0A0D2NSA7_GOSRA Uncharacterized protein OS=Gossypium raimondii GN=B456_002G243600 PE=4 SV=1	csv:101202897	probable leucine-rich repeat receptor-like protein kinase At1g68400; K04730 interleukin-1 receptor-associated kinase 1 [EC:2.7.11.1]	PF00069|Protein kinase domain	IPR000719|Protein kinase domain;IPR001611|Leucine-rich repeat	biological_process:GO:0006468|protein phosphorylation;cellular_component:GO:0016021|integral component of membrane;GO:0005886|plasma membrane;molecular_function:GO:0004672|protein kinase activity;GO:0005524|ATP binding;	gi|823136892|ref|XP_012468217.1|	PREDICTED: probable leucine-rich repeat receptor-like protein kinase At1g68400 [Gossypium raimondii] &gt;gi|763749264|gb|KJB16703.1| hypothetical protein B456_002G243600 [Gossypium raimondii]
GB_D01G2455	AT3G52990	GH_D01G2354	AT3G52990	Pyruvate kinase family protein	Q2RAK2	KPYC1_ORYSJ Pyruvate kinase 1, cytosolic OS=Oryza sativa subsp. japonica GN=Os11g0148500 PE=1 SV=1	A0A0D2QID7	A0A0D2QID7_GOSRA Pyruvate kinase OS=Gossypium raimondii GN=B456_002G243700 PE=3 SV=1	tcc:TCM_022396	Pyruvate kinase family protein; K00873 pyruvate kinase [EC:2.7.1.40]	PF00224|Pyruvate kinase, barrel domain	IPR001697|Pyruvate kinase;IPR015793|Pyruvate kinase, barrel;IPR015795|Pyruvate kinase, C-terminal	biological_process:GO:0006096|glycolytic process;molecular_function:GO:0000287|magnesium ion binding;GO:0030955|potassium ion binding;GO:0016301|kinase activity;GO:0004743|pyruvate kinase activity;	gi|823136894|ref|XP_012468218.1|	PREDICTED: pyruvate kinase, cytosolic isozyme-like [Gossypium raimondii] &gt;gi|763749252|gb|KJB16691.1| hypothetical protein B456_002G243700 [Gossypium raimondii]
GB_D01G2456	AT3G52990	GH_D01G2355	AT3G52990	Pyruvate kinase family protein	Q2RAK2	KPYC1_ORYSJ Pyruvate kinase 1, cytosolic OS=Oryza sativa subsp. japonica GN=Os11g0148500 PE=1 SV=1	A0A0D2MFF7	A0A0D2MFF7_GOSRA Pyruvate kinase OS=Gossypium raimondii GN=B456_002G243800 PE=3 SV=1	tcc:TCM_022396	Pyruvate kinase family protein; K00873 pyruvate kinase [EC:2.7.1.40]	PF02887|Pyruvate kinase, alpha/beta domain	IPR001697|Pyruvate kinase;IPR015793|Pyruvate kinase, barrel;IPR015795|Pyruvate kinase, C-terminal	biological_process:GO:0006096|glycolytic process;molecular_function:GO:0016301|kinase activity;GO:0030955|potassium ion binding;GO:0000287|magnesium ion binding;GO:0004743|pyruvate kinase activity;	gi|823136896|ref|XP_012468219.1|	PREDICTED: pyruvate kinase, cytosolic isozyme-like [Gossypium raimondii] &gt;gi|763749268|gb|KJB16707.1| hypothetical protein B456_002G243800 [Gossypium raimondii]
GB_D01G2457	AT3G10040	GH_D01G2356	AT3G10040	sequence-specific DNA binding transcription factor	-	-	A0A0D2NSB0	A0A0D2NSB0_GOSRA Uncharacterized protein OS=Gossypium raimondii GN=B456_002G243900 PE=4 SV=1	-	-	PF13837|Myb/SANT-like DNA-binding domain	-	-	gi|823136899|ref|XP_012468221.1|	PREDICTED: 46 kDa FK506-binding nuclear protein-like isoform X1 [Gossypium raimondii]
GB_D01G2458	AT5G03790	GH_D01G2357	AT5G03790	homeobox 51	Q4PSR7	ATB22_ARATH Homeobox-leucine zipper protein ATHB-22 OS=Arabidopsis thaliana GN=ATHB-22 PE=2 SV=1	A0A0D2RC05	A0A0D2RC05_GOSRA Uncharacterized protein OS=Gossypium raimondii GN=B456_002G244000 PE=4 SV=1	brp:103867270	homeobox-leucine zipper protein ATHB-22; K09338 homeobox-leucine zipper protein	PF02183|Homeobox associated leucine zipper	IPR000047|Helix-turn-helix motif;IPR001356|Homeobox domain;IPR003106|Leucine zipper, homeobox-associated;IPR017970|Homeobox, conserved site	biological_process:GO:0006355|regulation of transcription, DNA-templated;cellular_component:GO:0005634|nucleus;molecular_function:GO:0043565|sequence-specific DNA binding;GO:0003700|transcription factor activity, sequence-specific DNA binding;	gi|763749271|gb|KJB16710.1|	hypothetical protein B456_002G244000 [Gossypium raimondii]
GB_D01G2459	AT5G60900	GH_D01G2358	AT5G60900	receptor-like protein kinase 1	Q39202	RLK1_ARATH G-type lectin S-receptor-like serine	A0A0D2QIE8	A0A0D2QIE8_GOSRA Uncharacterized protein (Fragment) OS=Gossypium raimondii GN=B456_002G244100 PE=4 SV=1	sot:102600413	G-type lectin S-receptor-like serine	-	-	-	gi|763749272|gb|KJB16711.1|	hypothetical protein B456_002G244100, partial [Gossypium raimondii]
GB_D01G2460	AT5G03790	GH_D01G2359	AT5G03790	homeobox 51	Q4PSR7	ATB22_ARATH Homeobox-leucine zipper protein ATHB-22 OS=Arabidopsis thaliana GN=ATHB-22 PE=2 SV=1	A0A0D2MFG1	A0A0D2MFG1_GOSRA Uncharacterized protein OS=Gossypium raimondii GN=B456_002G244200 PE=4 SV=1	brp:103867270	homeobox-leucine zipper protein ATHB-22; K09338 homeobox-leucine zipper protein	PF00046|Homeobox domain	IPR000047|Helix-turn-helix motif;IPR001356|Homeobox domain;IPR003106|Leucine zipper, homeobox-associated;IPR017970|Homeobox, conserved site	biological_process:GO:0006355|regulation of transcription, DNA-templated;cellular_component:GO:0005634|nucleus;molecular_function:GO:0003700|transcription factor activity, sequence-specific DNA binding;GO:0043565|sequence-specific DNA binding;	gi|823136905|ref|XP_012468224.1|	PREDICTED: homeobox-leucine zipper protein ATHB-22-like [Gossypium raimondii] &gt;gi|763749273|gb|KJB16712.1| hypothetical protein B456_002G244200 [Gossypium raimondii]
GB_D01G2461	AT2G36620	GH_D01G2360	AT2G36620	ribosomal protein L24	Q9FUL4	RL24_PRUAV 60S ribosomal protein L24 OS=Prunus avium GN=RPL24 PE=2 SV=1	A0A0D2NSB2	A0A0D2NSB2_GOSRA Uncharacterized protein OS=Gossypium raimondii GN=B456_002G244300 PE=4 SV=1	jcu:105642337	60S ribosomal protein L24-like; K02896 large subunit ribosomal protein L24e	PF01246|Ribosomal protein L24e	IPR000988|Ribosomal protein L24e-related;IPR011017|TRASH domain;IPR023442|Ribosomal protein L24e, conserved site	-	gi|728821781|gb|KHG04496.1|	60S ribosomal L24 [Gossypium arboreum]
GB_D01G2462	AT3G53030	GH_D01G2361	AT3G53030	ser/arg-rich protein kinase 4	P36616	DSK1_SCHPO Protein kinase dsk1 OS=Schizosaccharomyces pombe (strain 972	A0A0D2RC09	A0A0D2RC09_GOSRA Uncharacterized protein OS=Gossypium raimondii GN=B456_002G244400 PE=4 SV=1	tcc:TCM_022389	Ser	PF00069|Protein kinase domain	IPR000719|Protein kinase domain;IPR008271|Serine/threonine-protein kinase, active site;IPR017441|Protein kinase, ATP binding site	biological_process:GO:0006468|protein phosphorylation;GO:0006979|response to oxidative stress;molecular_function:GO:0005524|ATP binding;GO:0004674|protein serine/threonine kinase activity;	gi|823136903|ref|XP_012468223.1|	PREDICTED: SRSF protein kinase 2-like [Gossypium raimondii] &gt;gi|763749276|gb|KJB16715.1| hypothetical protein B456_002G244400 [Gossypium raimondii]
GB_D01G2463	AT5G03795	GH_D01G2362	AT5G03795	Exostosin family protein	Q9FFN2	GLYT3_ARATH Probable glycosyltransferase At5g03795 OS=Arabidopsis thaliana GN=At5g03795 PE=3 SV=2	A0A0D2MFG4	A0A0D2MFG4_GOSRA Uncharacterized protein OS=Gossypium raimondii GN=B456_002G244600 PE=4 SV=1	mdm:103427775	probable glycosyltransferase At5g20260; K18789 xylogalacturonan beta-1,3-xylosyltransferase [EC:2.4.2.41]	PF03016|Exostosin family	IPR004263|Exostosin-like	cellular_component:GO:0016021|integral component of membrane;	gi|823136909|ref|XP_012468226.1|	PREDICTED: probable glycosyltransferase At5g03795 [Gossypium raimondii] &gt;gi|823136911|ref|XP_012468227.1| PREDICTED: probable glycosyltransferase At5g03795 [Gossypium raimondii] &gt;gi|763749278|gb|KJB16717.1| hypothetical protein B456_002G244600 [Gossypium raimondii]
GB_D01G2464	AT5G03800	GH_D01G2363	AT5G03800	Pentatricopeptide repeat (PPR) superfamily protein	Q9FFN1	PP363_ARATH Pentatricopeptide repeat-containing protein At5g03800 OS=Arabidopsis thaliana GN=EMB175 PE=2 SV=1	A0A0D2NSB6	A0A0D2NSB6_GOSRA Uncharacterized protein OS=Gossypium raimondii GN=B456_002G244700 PE=4 SV=1	sot:102581133	uncharacterized LOC102581133; K15271 ATP-dependent DNA helicase HFM1	PF13041|PPR repeat family	IPR002885|Pentatricopeptide repeat;IPR032867|DYW domain	biological_process:GO:0009793|embryo development ending in seed dormancy;molecular_function:GO:0008270|zinc ion binding;	gi|823136913|ref|XP_012468229.1|	PREDICTED: pentatricopeptide repeat-containing protein At5g03800 [Gossypium raimondii] &gt;gi|763749279|gb|KJB16718.1| hypothetical protein B456_002G244700 [Gossypium raimondii]
GB_D01G2465	AT3G57610	GH_D01G2364	AT3G57610	adenylosuccinate synthase	B9SL58	PURA2_RICCO Adenylosuccinate synthetase 2, chloroplastic OS=Ricinus communis GN=PURA2 PE=3 SV=1	A0A0D2QBG1	A0A0D2QBG1_GOSRA Adenylosuccinate synthetase OS=Gossypium raimondii GN=B456_002G244800 PE=3 SV=1	tcc:TCM_024758	Adenylosuccinate synthase; K01939 adenylosuccinate synthase [EC:6.3.4.4]	PF00709|Adenylosuccinate synthetase	IPR001114|Adenylosuccinate synthetase;IPR018220|Adenylosuccinate synthase, GTP-binding site;IPR033128|Adenylosuccinate synthase, active site	biological_process:GO:0044208|'de novo' AMP biosynthetic process;cellular_component:GO:0009507|chloroplast;molecular_function:GO:0004019|adenylosuccinate synthase activity;GO:0005525|GTP binding;GO:0000287|magnesium ion binding;	gi|823136915|ref|XP_012468230.1|	PREDICTED: adenylosuccinate synthetase 2, chloroplastic [Gossypium raimondii] &gt;gi|763749280|gb|KJB16719.1| hypothetical protein B456_002G244800 [Gossypium raimondii]
GB_D01G2466	AT4G10960	GH_D01G2365	AT4G10960	UDP-D-glucose/UDP-D-galactose 4-epimerase 5	O65781	GALE2_CYATE UDP-glucose 4-epimerase GEPI48 OS=Cyamopsis tetragonoloba PE=2 SV=1	A0A0D2QIF8	A0A0D2QIF8_GOSRA Uncharacterized protein OS=Gossypium raimondii GN=B456_002G244900 PE=3 SV=1	tcc:TCM_016477	UDP-D-glucose	PF16363|GDP-mannose 4,6 dehydratase	IPR008089|Nucleotide sugar epimerase;IPR016040|NAD(P)-binding domain	biological_process:GO:0006012|galactose metabolic process;molecular_function:GO:0003978|UDP-glucose 4-epimerase activity;	gi|823136917|ref|XP_012468231.1|	PREDICTED: UDP-glucose 4-epimerase GEPI48-like [Gossypium raimondii] &gt;gi|763749282|gb|KJB16721.1| hypothetical protein B456_002G244900 [Gossypium raimondii]
GB_D01G2467	AT3G53090	GH_D01G2366	AT3G53090	ubiquitin-protein ligase 7	Q9SCQ2	UPL7_ARATH E3 ubiquitin-protein ligase UPL7 OS=Arabidopsis thaliana GN=UPL7 PE=2 SV=1	A0A0D2RC17	A0A0D2RC17_GOSRA Uncharacterized protein OS=Gossypium raimondii GN=B456_002G245000 PE=4 SV=1	tcc:TCM_022374	E3 ubiquitin-protein ligase UPL7 isoform 2; K10588 ubiquitin-protein ligase E3 B [EC:2.3.2.26]	PF00632|HECT-domain (ubiquitin-transferase)	IPR000569|HECT domain	biological_process:GO:0016567|protein ubiquitination;molecular_function:GO:0004842|ubiquitin-protein transferase activity;GO:0016874|ligase activity;	gi|823136919|ref|XP_012468232.1|	PREDICTED: E3 ubiquitin-protein ligase UPL7 isoform X1 [Gossypium raimondii] &gt;gi|823136921|ref|XP_012468233.1| PREDICTED: E3 ubiquitin-protein ligase UPL7 isoform X1 [Gossypium raimondii] &gt;gi|823136923|ref|XP_012468234.1| PREDICTED: E3 ubiquitin-protein ligase UPL7 isoform X1 [Gossypium raimondii] &gt;gi|763749285|gb|KJB16724.1| hypothetical protein B456_002G245000 [Gossypium raimondii] &gt…
GB_D01G2468	AT5G03820	GH_D01G2367	AT5G03820	GDSL-like Lipase/Acylhydrolase family protein	Q9LZC5	GDL73_ARATH GDSL esterase	A0A0D2MFI5	A0A0D2MFI5_GOSRA Uncharacterized protein OS=Gossypium raimondii GN=B456_002G245100 PE=4 SV=1	aly:ARALYDRAFT_316517	T4O12.15; K01188 beta-glucosidase [EC:3.2.1.21]	PF00657|GDSL-like Lipase/Acylhydrolase	IPR001087|GDSL lipase/esterase	cellular_component:GO:0016021|integral component of membrane;molecular_function:GO:0016788|hydrolase activity, acting on ester bonds;	gi|823136931|ref|XP_012468239.1|	PREDICTED: GDSL esterase
GB_D01G2469	AT3G10060	GH_D01G2368	AT3G10060	FKBP-like peptidyl-prolyl cis-trans isomerase family protein	Q9SR70	FK164_ARATH Peptidyl-prolyl cis-trans isomerase FKBP16-4, chloroplastic OS=Arabidopsis thaliana GN=FKBP16-4 PE=1 SV=1	A0A0D2QBH2	A0A0D2QBH2_GOSRA Peptidyl-prolyl cis-trans isomerase OS=Gossypium raimondii GN=B456_002G245200 PE=4 SV=1	csv:101206539	peptidyl-prolyl cis-trans isomerase FKBP18, chloroplastic; K01802 peptidylprolyl isomerase [EC:5.2.1.8]	PF00254|FKBP-type peptidyl-prolyl cis-trans isomerase	IPR001179|FKBP-type peptidyl-prolyl cis-trans isomerase domain;IPR023566|Peptidyl-prolyl cis-trans isomerase, FKBP-type	biological_process:GO:0000413|protein peptidyl-prolyl isomerization;GO:0006457|protein folding;molecular_function:GO:0003755|peptidyl-prolyl cis-trans isomerase activity;	gi|823136933|ref|XP_012468240.1|	PREDICTED: peptidyl-prolyl cis-trans isomerase FKBP16-4, chloroplastic isoform X1 [Gossypium raimondii] &gt;gi|763749295|gb|KJB16734.1| hypothetical protein B456_002G245200 [Gossypium raimondii]
GB_D01G2470	AT2G36670	GH_D01G2369	AT2G36670	Eukaryotic aspartyl protease family protein	Q9S9K4	ASPL2_ARATH Aspartic proteinase-like protein 2 OS=Arabidopsis thaliana GN=At1g65240 PE=1 SV=2	A0A0D2QBH7	A0A0D2QBH7_GOSRA Uncharacterized protein OS=Gossypium raimondii GN=B456_002G245300 PE=4 SV=1	aly:ARALYDRAFT_489138	aspartyl protease family protein; K00924	PF14543|Xylanase inhibitor N-terminal	IPR001461|Aspartic peptidase A1 family;IPR032799|Xylanase inhibitor, C-terminal;IPR032861|Xylanase inhibitor, N-terminal;IPR033121|Peptidase family A1 domain	biological_process:GO:0006508|proteolysis;molecular_function:GO:0004190|aspartic-type endopeptidase activity;	gi|823136929|ref|XP_012468238.1|	PREDICTED: aspartic proteinase-like protein 2 isoform X2 [Gossypium raimondii] &gt;gi|763749300|gb|KJB16739.1| hypothetical protein B456_002G245300 [Gossypium raimondii]
GB_D01G2471	AT2G36720	GH_D01G2370	AT2G36720	Acyl-CoA N-acyltransferase with RING/FYVE/PHD-type zinc finger domain-containing protein	F4IXE7	IDM1_ARATH Increased DNA methylation 1 OS=Arabidopsis thaliana GN=IDM1 PE=1 SV=1	A0A0D2QIH2	A0A0D2QIH2_GOSRA Uncharacterized protein OS=Gossypium raimondii GN=B456_002G245400 PE=4 SV=1	sita:101785187	protein CHROMATIN REMODELING 4; K11643 chromodomain-helicase-DNA-binding protein 4 [EC:3.6.4.12]	PF00628|PHD-finger	IPR001965|Zinc finger, PHD-type;IPR019786|Zinc finger, PHD-type, conserved site;IPR019787|Zinc finger, PHD-finger;IPR032308|Jas TPL-binding domain	molecular_function:GO:0008270|zinc ion binding;	gi|823136943|ref|XP_012468245.1|	PREDICTED: uncharacterized protein LOC105786392 isoform X4 [Gossypium raimondii] &gt;gi|763749302|gb|KJB16741.1| hypothetical protein B456_002G245400 [Gossypium raimondii] &gt;gi|763749303|gb|KJB16742.1| hypothetical protein B456_002G245400 [Gossypium raimondii]
GB_D01G2472	AT2G36720	GH_D01G2371	AT2G36720	Acyl-CoA N-acyltransferase with RING/FYVE/PHD-type zinc finger domain-containing protein	F4IXE7	IDM1_ARATH Increased DNA methylation 1 OS=Arabidopsis thaliana GN=IDM1 PE=1 SV=1	A0A0D2QII1	A0A0D2QII1_GOSRA Uncharacterized protein OS=Gossypium raimondii GN=B456_002G245500 PE=4 SV=1	sita:101785187	protein CHROMATIN REMODELING 4; K11643 chromodomain-helicase-DNA-binding protein 4 [EC:3.6.4.12]	PF00628|PHD-finger	IPR001965|Zinc finger, PHD-type;IPR019786|Zinc finger, PHD-type, conserved site;IPR019787|Zinc finger, PHD-finger;IPR032308|Jas TPL-binding domain	molecular_function:GO:0008270|zinc ion binding;	gi|823136949|ref|XP_012468248.1|	PREDICTED: uncharacterized protein LOC105786394 isoform X1 [Gossypium raimondii] &gt;gi|763749307|gb|KJB16746.1| hypothetical protein B456_002G245500 [Gossypium raimondii] &gt;gi|763749309|gb|KJB16748.1| hypothetical protein B456_002G245500 [Gossypium raimondii] &gt;gi|763749312|gb|KJB16751.1| hypothetical protein B456_002G245500 [Gossypium raimondii]
GB_D01G2473	AT3G09920	GH_D01G2372	AT3G09920	phosphatidyl inositol monophosphate 5 kinase	Q8L850	PI5K9_ARATH Phosphatidylinositol 4-phosphate 5-kinase 9 OS=Arabidopsis thaliana GN=PIP5K9 PE=1 SV=2	A0A0D2NSC4	A0A0D2NSC4_GOSRA Uncharacterized protein OS=Gossypium raimondii GN=B456_002G245600 PE=4 SV=1	tcc:TCM_022303	Phosphatidyl inositol monophosphate 5 kinase isoform 1; K00889 1-phosphatidylinositol-4-phosphate 5-kinase [EC:2.7.1.68]	PF01504|Phosphatidylinositol-4-phosphate 5-Kinase	IPR002498|Phosphatidylinositol-4-phosphate 5-kinase, core;IPR003409|MORN motif;IPR023610|Phosphatidylinositol-4-phosphate 5-kinase	biological_process:GO:0005975|carbohydrate metabolic process;GO:0006520|cellular amino acid metabolic process;GO:0046854|phosphatidylinositol phosphorylation;cellular_component:GO:0016020|membrane;GO:0005634|nucleus;GO:0005829|cytosol;molecular_function:GO:0016308|1-phosphatidylinositol-4-phosphate 5-kinase activity;GO:0005524|ATP binding;	gi|823136953|ref|XP_012468251.1|	PREDICTED: phosphatidylinositol 4-phosphate 5-kinase 9-like [Gossypium raimondii] &gt;gi|823136955|ref|XP_012468252.1| PREDICTED: phosphatidylinositol 4-phosphate 5-kinase 9-like [Gossypium raimondii] &gt;gi|823136957|ref|XP_012468253.1| PREDICTED: phosphatidylinositol 4-phosphate 5-kinase 9-like [Gossypium raimondii] &gt;gi|823136959|ref|XP_012468254.1| PREDICTED: phosphatidylinositol 4-phosphat…
		GH_D01G2373	AT2G28200	C2H2-type zinc finger family protein	Q681X4	ZAT5_ARATH Zinc finger protein ZAT5 OS=Arabidopsis thaliana GN=ZAT5 PE=2 SV=1	A0A0D2QBI9	A0A0D2QBI9_GOSRA Uncharacterized protein OS=Gossypium raimondii GN=B456_002G245800 PE=4 SV=1	-	-	PF13912|C2H2-type zinc finger	IPR007087|Zinc finger, C2H2;IPR015880|Zinc finger, C2H2-like	-	gi|763749315|gb|KJB16754.1|	hypothetical protein B456_002G245800 [Gossypium raimondii]
GB_D01G2474	AT5G03510
GB_D01G2475	AT2G36830	GH_D01G2374	AT2G36830	gamma tonoplast intrinsic protein	P25818	TIP11_ARATH Aquaporin TIP1-1 OS=Arabidopsis thaliana GN=TIP1-1 PE=1 SV=1	A0A0D2RC49	A0A0D2RC49_GOSRA Uncharacterized protein OS=Gossypium raimondii GN=B456_002G245900 PE=3 SV=1	tcc:TCM_022298	Aquaporin TIP1,6; K09873 aquaporin TIP	PF00230|Major intrinsic protein	IPR000425|Major intrinsic protein;IPR022357|Major intrinsic protein, conserved site	biological_process:GO:0006810|transport;cellular_component:GO:0016021|integral component of membrane;molecular_function:GO:0005215|transporter activity;	gi|823136965|ref|XP_012468257.1|	PREDICTED: aquaporin TIP1-1 [Gossypium raimondii] &gt;gi|763749316|gb|KJB16755.1| hypothetical protein B456_002G245900 [Gossypium raimondii]
